# Supplementary material
Source: publisher figshare collection journal article supplement (https://gsapubs.figshare.com/articles/dataset/_/12529937)

## 2013234 - Appendix DR2

- Aldrich, L.T. and Wetherill, G.W., 1958, Geochronology by radioactive decay: Annual Reviews of Nuclear Science, v.8, p. 257-298.
- Baksi, A.K., York, D., and Watkins, N.D., 1967, Age of the Steens Mountain geomagnetic polarity transition. Journal of Geophysical Research, v. 72, p. 6299-6308.
- Baksi, A.K. and Farrar, E., 1990, Evidence for errors in the geomagnetic polarity time-scale at 17-15 Ma:  $^{40}\text{Ar}/^{39}\text{Ar}$  dating of basalt from the Pacific northwest, USA. Geophysical Research Letters, v. 17, p. 1117-1120.
- Barry, T.L., Self, S., Kelley, S.P., Reidel, S., Hooper, P., Widdowson, M., 2010, New  $^{40}\text{Ar}/^{39}\text{Ar}$  dating of the Grande Ronde lavas, Columbia River Basalts, USA: implications for duration of flood basalt eruption episodes, Lithos, v. 118, p. 213-222.
- Brueseke, M.E., Heizler, M.T., Hart, W.K., and Mertzman, S.A., 2007, Distribution and geochronology of Oregon Plateau (U.S.A.) flood basalt volcanism: The Steens basalt revisited, Journal of Volcanology and Geothermal Research, v. 161, p.187-214, doi:10.1016/j.jvolgeores.2006.12.004.
- Brueseke, M.E., and Hart, W.K., 2008, Geology and Petrology of the mid-Miocene Santa Rosa-Calico Volcanic Complex, Northwestern Nevada, Nevada Bureau of Mines and Geology Bulletin 113, 44p.
- Camp, V.E., Ross, M.E., Duncan, R.A., Jargoe, N.A., Coe, R.S., Hanan, B.B., Johnson, J.A., 2013, this volume, The Steens Basalt: Earliest lavas of the Columbia River Basalt Group, Geological Society of America Special Paper 497.
- Colgan, J.P., Dumitru, T.A., McWilliams, M., and Miller, E.L., 2006, Timing of Cenozoic volcanism and Basin and Range extension in northwestern Nevada: New constraints from the Pine Forest Range, Geological Society of America Bulletin, v. 118, p. 126-139, doi:10.1130/B25681.1
- Duncan, 1982,  $^{40}\text{Ar}/^{39}\text{Ar}$  dating of Columbia River Basalts, unpublished Rockwell/Hanford report M29-SBB-258874.
- Duncan, 1983,  $^{40}\text{Ar}/^{39}\text{Ar}$  radiometric age determinations final report of completed work, unpublished Rockwell/Hanford report M30-SBB-294449.
- Evernden, J.F. and James, G.T., 1964, Potassium-Argon dates and the Tertiary floras of North America, American Journal of Science, v. 262, p. 945-974.

- Fiebelkorn, R.B., Walker, G.W., MacLeod, N.S., McKee, E.H., Smith, J.G., 1982, Index to K-Ar age determinations for the State of Oregon, USGS Open-file report 82-596, 40 p., index map, scale 1:1,000,000.
- Greene, R.C., Walker, G.W., Corcoran, R.E., 1972, Geologic map of the Burns quadrangle, USGS Open-file map I-680, scale 1:250,000.
- Hooper, P.R., Binger, G.B., and Lees, K.R., 2002, Ages of the Steens and Columbia River flood basalts and their relationship to extension-related calc-alkaline volcanism in eastern Oregon: Geological Society of America Bulletin, v. 114, p. 43-50.
- Jarboe, N.A., Coe, R.S., Renne, P.R., Glen, J.M.G., and Mankinen, E.A., 2008, Quickly erupted volcanic sections of the Steens Basalt, Columbia River Basalt Group: Secular variation, tectonic rotation, and the Steens Mountain reversal: Geochemistry Geophysics Geosystems, v. 9, no. 11, DOI:10.1029/2008GC002067.
- Jarboe, N.A., R.S. Coe, P.R. Renne, and J.M.G. Glen, 2010, The age of the Steens reversal and the Columbia River Basalt Group, Chemical Geology, v. 274, p. 168-178.
- Krueger Enterprises Inc., Geochron Lab. Division, 1984, Reidel S., unpublished data.
- Laursen, J. McKee and Hammond, P.E., 1974, Summary of radiometric ages of Oregon and Washington rocks, through 1972, Isochron/West, v.9, 32 pp.
- Lees, K. R., 1994, Magmatic and tectonic changes through time in the Neogene volcanic rocks of the Vale area, Oregon, North Western USA, [PhD thesis]: Milton Keynes, U.K., The Open University, 283 pp.
- Long, P.E. and Duncan, R.A., 1983,  $^{40}\text{Ar}/^{39}\text{Ar}$  ages of Columbia River Basalt from deep boreholes in south-central Washington, EOS, Trans. AGU (abs.), v. 64, p. 90.
- McKee, E.H., Swanson, D.A., Wright, T.L., 1977, Duration and volume of Columbia River basalt volcanism, Washington, Oregon, and Idaho, Geological Society of America Abstracts with Programs 9, p. 463.
- Reidel, S.P., Tolan, T.L., Hooper, P.R., Beeson, M.H., Fecht, K.R., Bentley, R.D., Anderson, J.L., 1989, The Grande Ronde Basalt, Columbia River Basalt Group; stratigraphic descriptions and correlations in Washington, Oregon, and Idaho, *in* Reidel, S.P., and Hooper, P.R., eds: Geological Society of America Special Paper v. 239, p. 21-53.
- Scarberry, K.C., Meigs, A.J., Grunder, A.J., 2009, Faulting in a propagating continental rift: insight from the late Miocene structural development of the Abert Rim fault, southern Oregon, USA, Tectonophysics.

- Shoemaker, K.A. and Hart, W.K., 2002, Temporal controls on basalt genesis and evolution on the Owyhee plateau, Idaho and Oregon, *in* Bonnichsen, B., White, C.M., and McCurry, M., eds., Tectonic and magmatic evolution of the Snake River Plain volcanic province: Idaho Geological Survey Bulletin 30, p. 313-328.
- Steiger, R.H. and Jäger, E., 1977, Subcommissson on geochronology: convention on the use of decay constants in geo- and cosmochemistry, Earth and Planetary Science Letters, v. 6, p.359-362.
- Sutter, J.F., 1978, K-Ar ages of Cenozoic volcanic rocks from the Oregon Cascades west of 121° 30', Isochron/West, v.21, p. 15-21.
- Swisher, C.C., Ach, J.A., Hart, W.K., 1990, Laser fusion  $^{40}\text{Ar}$ - $^{39}\text{Ar}$  dating of the type Steens Mountain Basalt, southeastern Oregon and the age of the Steens geomagnetic polarity transition: Eos, Trans., American Geophysical Union, v. 71, p. 1296.
- U.S. Energy Research and Development Administration under contract E(45-1)-2130, 1976, Report ARH-ST-137 Preliminary feasibility study on storage of radioactive wastes in Columbia River Basalts, Research and Engineering Division.
- Watkins, N.D., Baksi, A.K., 1974, Magnetostratigraphy and oroclinal folding of the Columbia River, Steens, and Owyhee Basalts in Oregon, Washington, and Idaho, American Journal of Science, v. 274, p. 148-189.

Excel file available as well.

| Member                            | Unit              | Sample number   | Material           | Plateau/total no steps | % <sup>39</sup> Ar | MSWD | % <sup>40</sup> Ar* | <sup>37</sup> Ar/ <sup>39</sup> Ar | <sup>40</sup> Ar/ <sup>39</sup> Ar age | 1s error |
|-----------------------------------|-------------------|-----------------|--------------------|------------------------|--------------------|------|---------------------|------------------------------------|----------------------------------------|----------|
| <b>Saddle Mountains Formation</b> |                   |                 |                    |                        |                    |      |                     |                                    |                                        |          |
| Pomona                            | Pomona Member     | DCy5            | grdmass glassy mat | 11/14                  | 95                 | 0.85 | 54.2                | 9.25                               | 10.34                                  | 0.21     |
| Priest Rapids                     | Basalt of Rosalia | DS1-(1)         | grdmass            | 4/9                    | 69                 | 0.94 | 90.9                | 1.21                               | 15.07                                  | 0.07     |
|                                   | Basalt of Rosalia | DS1-(2)         | grdmass            | 3/7                    | 56                 | 0.79 | 86.1                | 0.55                               | 15.25                                  | 0.08     |
|                                   | Basalt of Rosalia | DS1-(3)         | grdmass            | 6/11                   | 61                 | 1.5  | 77.3                | 4.24                               | 14.80                                  | 0.17     |
| Roza                              | Roza Member       | CL3-(1)         | grdmass            | 6/10                   | 82                 | 0.5  | 35.3                | 0.31                               | 12.87                                  | 0.37     |
|                                   | Roza Member       | DF1-(1)         | grdmass            | 9/9                    | 100                | 1.9  | 86.1                | 2.79                               | 16.50                                  | 0.23     |
|                                   | Roza Member       | DF3-(1)         | grdmass            | no plateau             | -                  | -    | 68.6                | 0.09                               | -                                      | -        |
|                                   | Roza Member       | FsC7            | grdmass            | no plateau             | -                  | -    | 68.2                | 2.89                               | -                                      | -        |
|                                   | Roza Member       | CRB06-153       | grdmass            | no plateau             | -                  | -    | 86.4                | 0.43                               | -                                      | -        |
|                                   | Roza Member       | CRB06-153 dup   | grdmass            | 3/6                    | 60                 | 1.6  | 79.4                | 0.67                               | 14.98                                  | 0.06     |
| Frenchman Springs                 | B. of Sand Hollow | CL4             | grdmass            | 5/8                    | 70                 | 0.85 | -7.1                | 0.47                               | 16.42                                  | 0.38     |
|                                   | B. of Sand Hollow | DCy3a           | grdmass            | no plateau             | -                  | -    | 91.3                | 1.97                               | -                                      | -        |
|                                   | B. of Sand Hollow | CRB05-008       | grdmass            | 4/6                    | 71                 | 1.03 | 17.4                | 1.25                               | 13.54                                  | 0.16     |
|                                   | B. of Sand Hollow | CRB05-049       | grdmass            | 9/14                   | 71                 | 0.53 | 75.2                | 3.01                               | 14.71                                  | 0.08     |
|                                   | B. of Sand Hollow | PF7             | grdmass            | 7/7                    | 100                | 1.8  | 78.3                | 0.15                               | 15.27                                  | 0.18     |
| Frenchman Springs                 | Basalt of Ginkgo  | CRB05-011       | grdmass            | 5/7                    | 60                 | 0.32 | 66.3                | 1.01                               | 12.48                                  | 0.14     |
|                                   | Basalt of Ginkgo  | CRB05-011 (dup) | grdmass            | no plateau             | -                  | -    | 18.8                | 2.56                               | -                                      | -        |
|                                   | Basalt of Ginkgo  | CRB05-012       | grdmass            | no plateau             | -                  | -    | 75.8                | 1.04                               | -                                      | -        |
|                                   | Basalt of Ginkgo  | FsC8-(1)        | grdmass            | 6/8                    | 52                 | 0.63 | 91.8                | 1.93                               | 16.20                                  | 0.10     |
|                                   | Basalt of Ginkgo  | FsC8-(2)        | grdmass            | no plateau             | -                  | -    | 75.9                | 0.98                               | -                                      | -        |
|                                   | Basalt of Ginkgo  | FsC8-(2) dup    | grdmass            | 4/7                    | 53                 | 1.2  | 53.9                | 1.50                               | 15.97                                  | 0.28     |

**Columbia River Basalt Group**Amounts x10<sup>-12</sup> ccSTPMass discrimination per AMU, based on power law (D<sup>i</sup>): 1.01057 ± 0.00005

Decay constants as quoted in Renne et al. (2010).

**Saddle Mountains Formation, Pomona - DCy5 (groundmass glassy matrix). Plateau steps: 1 to 11, inclusive.**

J-value: 0.008675

Plateau age: 10.34 ± 0.21

Wholerock K<sub>2</sub>O = 0.68 wt % (Vye, PhD thesis)

| Step            | <sup>40</sup> Ar | ±     | <sup>39</sup> Ar | ±     | <sup>38</sup> Ar | ±     | <sup>37</sup> Ar | ±     | <sup>36</sup> Ar | ±     | <sup>37</sup> Ar/ <sup>39</sup> Ar | <sup>40</sup> Ar* % | <sup>40</sup> Ar*/ <sup>39</sup> Ar | ±     | Age    | ± <sup>40</sup> Ar/ <sup>39</sup> Ar |
|-----------------|------------------|-------|------------------|-------|------------------|-------|------------------|-------|------------------|-------|------------------------------------|---------------------|-------------------------------------|-------|--------|--------------------------------------|
| step 1 - 0.3 W  | 159.537          | 0.375 | 95.370           | 0.129 | 1.328            | 0.019 | 179.894          | 2.231 | 0.345            | 0.020 | 1.89                               | 36.0                | 0.603                               | 0.062 | 9.413  | 0.95                                 |
| step 2 - 0.4 W  | 108.615          | 0.214 | 103.295          | 0.109 | 1.343            | 0.022 | 276.579          | 2.232 | 0.122            | 0.020 | 2.68                               | 66.7                | 0.701                               | 0.057 | 10.941 | 0.88                                 |
| step 3 - 0.5 W  | 204.969          | 0.212 | 181.342          | 0.162 | 2.564            | 0.029 | 752.760          | 2.233 | 0.260            | 0.017 | 4.15                               | 62.5                | 0.706                               | 0.028 | 11.021 | 0.43                                 |
| step 4 - 0.6 W  | 167.413          | 0.287 | 148.488          | 0.197 | 2.224            | 0.022 | 745.447          | 2.234 | 0.236            | 0.017 | 5.02                               | 58.3                | 0.658                               | 0.034 | 10.266 | 0.53                                 |
| step 5 - 0.7 W  | 112.330          | 0.292 | 99.191           | 0.113 | 1.489            | 0.022 | 669.737          | 2.237 | 0.172            | 0.020 | 6.75                               | 54.8                | 0.620                               | 0.059 | 9.680  | 0.92                                 |
| step 6 - 0.8 W  | 126.150          | 0.254 | 107.301          | 0.186 | 1.542            | 0.020 | 805.963          | 2.237 | 0.200            | 0.024 | 7.51                               | 53.2                | 0.626                               | 0.066 | 9.768  | 1.01                                 |
| step 7 - 1.0 W  | 121.398          | 0.241 | 104.075          | 0.141 | 1.563            | 0.019 | 1060.733         | 2.239 | 0.184            | 0.020 | 10.19                              | 55.1                | 0.643                               | 0.057 | 10.036 | 0.88                                 |
| step 8 - 1.5 W  | 201.087          | 0.221 | 167.152          | 0.141 | 2.476            | 0.022 | 1908.477         | 2.240 | 0.305            | 0.018 | 11.42                              | 55.2                | 0.664                               | 0.032 | 10.365 | 0.49                                 |
| step 9 - 2.0 W  | 162.916          | 0.231 | 136.414          | 0.149 | 1.880            | 0.020 | 1843.486         | 2.241 | 0.258            | 0.020 | 13.51                              | 53.2                | 0.635                               | 0.044 | 9.910  | 0.68                                 |
| step 10 - 2.5 W | 81.507           | 0.194 | 74.625           | 0.134 | 1.112            | 0.020 | 1244.314         | 2.242 | 0.142            | 0.020 | 16.67                              | 48.7                | 0.532                               | 0.080 | 8.305  | 1.23                                 |
| step 11 - 3.0 W | 131.309          | 0.158 | 106.863          | 0.229 | 1.680            | 0.014 | 1923.389         | 2.278 | 0.186            | 0.024 | 18.00                              | 58.1                | 0.714                               | 0.065 | 11.134 | 1.01                                 |
| step 12 - 4.0 W | 51.715           | 0.141 | 47.056           | 0.078 | 0.659            | 0.012 | 1002.301         | 1.918 | 0.103            | 0.010 | 21.30                              | 41.3                | 0.454                               | 0.066 | 7.094  | 1.01                                 |
| step 13 - 5.0 W | 23.859           | 0.079 | 23.162           | 0.081 | 0.288            | 0.012 | 486.642          | 1.919 | 0.048            | 0.010 | 21.01                              | 40.6                | 0.418                               | 0.130 | 6.538  | 2.01                                 |
| Total           | 1652.805         | 0.845 | 1394.335         | 0.534 | 20.148           | 0.072 | 12899.721        | 7.910 | 2.561            | 0.068 | 9.25                               | 54.2                |                                     |       |        |                                      |

**Wanapum Formation, Basalt of Rosalia - DS1-(1) (groundmass). Plateau steps: 2-5, inclusive.**

J-value: 0.005284

Plateau age: 15.07 ± 0.07

Wholerock K<sub>2</sub>O = 1.53 wt % (Vye, PhD thesis)

| Step   | <sup>40</sup> Ar | ±     | <sup>39</sup> Ar | ±     | <sup>38</sup> Ar | ±     | <sup>37</sup> Ar | ±     | <sup>36</sup> Ar | ±     | <sup>37</sup> Ar/ <sup>39</sup> Ar | <sup>40</sup> Ar* % | <sup>40</sup> Ar*/ <sup>39</sup> Ar | ±     | Age    | ± <sup>40</sup> Ar/ <sup>39</sup> Ar |
|--------|------------------|-------|------------------|-------|------------------|-------|------------------|-------|------------------|-------|------------------------------------|---------------------|-------------------------------------|-------|--------|--------------------------------------|
| step1  | 0.575            | 0.394 | -0.065           | 0.043 | -0.016           | 0.037 | 0.000            | 0.101 | 0.000            | 0.008 | 0.00                               | 100.0               | n.d.                                | n.d.  | n.d.   | n.d.                                 |
| step2  | 278.164          | 0.509 | 160.112          | 0.068 | 2.290            | 0.037 | 70.980           | 0.586 | 0.110            | 0.008 | 0.44                               | 88.3                | 1.534                               | 0.016 | 14.560 | 0.17                                 |
| step3  | 856.427          | 4.278 | 500.998          | 0.371 | 7.325            | 0.048 | 405.563          | 3.193 | 0.223            | 0.014 | 0.81                               | 92.3                | 1.578                               | 0.012 | 14.978 | 0.13                                 |
| step4  | 903.205          | 3.329 | 531.439          | 1.897 | 7.614            | 0.062 | 319.940          | 2.954 | 0.208            | 0.014 | 0.60                               | 93.2                | 1.584                               | 0.011 | 15.036 | 0.13                                 |
| step5  | 823.615          | 2.018 | 482.097          | 0.284 | 6.991            | 0.048 | 335.474          | 2.294 | 0.204            | 0.011 | 0.70                               | 92.7                | 1.584                               | 0.008 | 15.032 | 0.10                                 |
| step6  | 584.727          | 1.180 | 339.196          | 0.198 | 4.886            | 0.053 | 478.152          | 4.818 | 0.135            | 0.011 | 1.41                               | 93.2                | 1.606                               | 0.010 | 15.243 | 0.12                                 |
| step7  | 434.920          | 0.719 | 253.682          | 0.232 | 3.506            | 0.041 | 447.900          | 4.509 | 0.166            | 0.008 | 1.77                               | 88.7                | 1.521                               | 0.010 | 14.438 | 0.12                                 |
| step8  | 198.026          | 0.461 | 116.657          | 0.121 | 1.565            | 0.038 | 291.642          | 2.071 | 0.079            | 0.008 | 2.50                               | 88.3                | 1.499                               | 0.022 | 14.229 | 0.22                                 |
| step9  | 226.400          | 0.459 | 128.834          | 0.169 | 1.846            | 0.037 | 405.026          | 3.505 | 0.136            | 0.008 | 3.14                               | 82.3                | 1.446                               | 0.020 | 13.728 | 0.20                                 |
| step10 | 320.020          | 0.506 | 179.867          | 0.129 | 2.564            | 0.037 | 512.448          | 3.717 | 0.168            | 0.008 | 2.85                               | 84.5                | 1.503                               | 0.014 | 14.269 | 0.15                                 |
| Total  | 4626.078         | 6.038 | 2692.817         | 1.994 | 38.571           | 0.141 | 3267.126         | 9.924 | 1.429            | 0.032 | 1.21                               | 90.9                |                                     |       |        |                                      |

**Wanapum Formation, Basalt of Rosalia - DS1-(2) (groundmass). Plateau steps: 3 to 5, inclusive**

J-value: 0.007171

Plateau age: 15.25 ± 0.08

Wholerock K<sub>2</sub>O = 1.53 wt % (Vye, PhD thesis)

| Step  | <sup>40</sup> Ar | ±     | <sup>39</sup> Ar | ±     | <sup>38</sup> Ar | ±     | <sup>37</sup> Ar | ±     | <sup>36</sup> Ar | ±     | <sup>37</sup> Ar/ <sup>39</sup> Ar | <sup>40</sup> Ar* % | <sup>40</sup> Ar*/ <sup>39</sup> Ar | ±     | Age    | ± <sup>40</sup> Ar/ <sup>39</sup> Ar |
|-------|------------------|-------|------------------|-------|------------------|-------|------------------|-------|------------------|-------|------------------------------------|---------------------|-------------------------------------|-------|--------|--------------------------------------|
| step1 | 34.570           | 0.057 | 17.004           | 0.049 | 0.254            | 0.002 | 10.090           | 0.125 | 0.062            | 0.000 | 0.59                               | 47.1                | 0.957                               | 0.004 | 12.336 | 0.08                                 |
| step2 | 95.823           | 0.147 | 56.037           | 0.066 | 0.794            | 0.004 | 23.819           | 0.125 | 0.119            | 0.000 | 0.43                               | 63.3                | 1.082                               | 0.003 | 13.944 | 0.07                                 |
| step3 | 244.054          | 0.112 | 176.439          | 0.105 | 2.410            | 0.008 | 78.142           | 0.125 | 0.124            | 0.004 | 0.44                               | 85.0                | 1.176                               | 0.006 | 15.151 | 0.10                                 |
| step4 | 418.301          | 0.355 | 303.413          | 0.244 | 4.181            | 0.007 | 125.542          | 0.177 | 0.193            | 0.010 | 0.41                               | 86.4                | 1.191                               | 0.010 | 15.340 | 0.14                                 |
| step5 | 477.477          | 0.543 | 367.934          | 0.115 | 4.896            | 0.007 | 156.057          | 0.177 | 0.135            | 0.010 | 0.42                               | 91.6                | 1.189                               | 0.008 | 15.317 | 0.12                                 |
| step6 | 535.441          | 0.265 | 408.791          | 0.499 | 5.603            | 0.010 | 250.675          | 0.177 | 0.209            | 0.010 | 0.61                               | 88.5                | 1.159                               | 0.007 | 14.928 | 0.11                                 |
| step7 | 265.070          | 0.153 | 198.211          | 0.165 | 2.767            | 0.008 | 196.974          | 0.135 | 0.132            | 0.007 | 0.99                               | 85.3                | 1.140                               | 0.010 | 14.693 | 0.15                                 |
| Total | 2070.736         | 0.743 | 1527.829         | 0.605 | 20.905           | 0.019 | 841.300          | 0.398 | 0.974            | 0.019 | 0.55                               | 86.1                |                                     |       |        |                                      |

**Wanapum Formation, Basalt of Rosalia - DS1-(3) (groundmass). Plateau steps: 5 to 10, inclusive**

J-value: 0.008658

Plateau age: 14.80 ± 0.17

Wholerock K<sub>2</sub>O = 1.53 wt % (Vye, PhD thesis)

| Step            | <sup>40</sup> Ar | ±     | <sup>39</sup> Ar | ±     | <sup>38</sup> Ar | ±     | <sup>37</sup> Ar | ±      | <sup>36</sup> Ar | ±     | <sup>37</sup> Ar/ <sup>39</sup> Ar | <sup>40</sup> Ar* % | <sup>40</sup> Ar*/ <sup>39</sup> Ar | ±     | Age    | ± <sup>40</sup> Ar/ <sup>39</sup> Ar |
|-----------------|------------------|-------|------------------|-------|------------------|-------|------------------|--------|------------------|-------|------------------------------------|---------------------|-------------------------------------|-------|--------|--------------------------------------|
| step1 - 0.3 W   | 63.678           | 0.387 | 55.423           | 0.181 | 0.840            | 0.015 | 46.456           | 5.404  | 0.018            | 0.017 | 0.84                               | 91.8                | 1.055                               | 0.090 | 16.401 | 1.39                                 |
| step 2 - 0.4 W  | 193.985          | 0.408 | 171.970          | 0.208 | 2.396            | 0.013 | 156.504          | 5.406  | 0.035            | 0.017 | 0.91                               | 94.7                | 1.068                               | 0.029 | 16.607 | 0.45                                 |
| step 3 - 0.5 W  | 450.988          | 0.499 | 401.789          | 1.020 | 5.419            | 0.023 | 526.293          | 5.410  | 0.183            | 0.017 | 1.31                               | 88.0                | 0.988                               | 0.013 | 15.360 | 0.20                                 |
| step 4 - 0.6 W  | 407.903          | 0.577 | 343.018          | 0.499 | 4.663            | 0.018 | 792.874          | 5.412  | 0.237            | 0.017 | 2.31                               | 82.8                | 0.985                               | 0.015 | 15.314 | 0.23                                 |
| step 5 - 0.7 W  | 359.430          | 0.375 | 299.583          | 0.253 | 4.325            | 0.028 | 971.148          | 2.609  | 0.248            | 0.026 | 3.24                               | 79.6                | 0.955                               | 0.026 | 14.859 | 0.40                                 |
| step 6 - 0.8 W  | 265.614          | 0.551 | 218.869          | 0.461 | 2.962            | 0.045 | 705.823          | 2.613  | 0.167            | 0.026 | 3.22                               | 81.4                | 0.987                               | 0.035 | 15.359 | 0.54                                 |
| step 7 - 1.0 W  | 380.623          | 0.392 | 288.375          | 0.247 | 4.082            | 0.026 | 1346.452         | 2.615  | 0.296            | 0.029 | 4.67                               | 77.0                | 1.016                               | 0.030 | 15.803 | 0.46                                 |
| step 8 - 1.5 W  | 600.182          | 0.581 | 444.567          | 0.290 | 6.379            | 0.045 | 2608.090         | 2.616  | 0.620            | 0.030 | 5.87                               | 69.5                | 0.938                               | 0.020 | 14.587 | 0.31                                 |
| step 9 - 2.0 W  | 437.159          | 0.581 | 334.655          | 0.290 | 4.888            | 0.030 | 2208.436         | 2.617  | 0.422            | 0.025 | 6.60                               | 71.5                | 0.934                               | 0.022 | 14.528 | 0.34                                 |
| step 10 - 3.0 W | 350.652          | 0.472 | 265.691          | 0.264 | 4.008            | 0.032 | 2013.125         | 2.618  | 0.358            | 0.027 | 7.58                               | 69.9                | 0.922                               | 0.030 | 14.346 | 0.46                                 |
| step 11 - 4.0 W | 278.685          | 0.385 | 204.579          | 0.247 | 2.858            | 0.026 | 1456.021         | 2.620  | 0.322            | 0.026 | 7.12                               | 65.8                | 0.896                               | 0.038 | 13.948 | 0.59                                 |
| Total           | 3788.899         | 1.594 | 3028.521         | 1.415 | 42.820           | 0.097 | 12831.222        | 12.840 | 2.907            | 0.079 | 4.24                               | 77.3                |                                     |       |        |                                      |

**Wanapum Formation, Roza Member - CL3-(1) (groundmass). Plateau steps: 6 to 10, inclusive.**

J-value: 0.002540

Plateau age: 12.87 ± 0.37

No wholerock K<sub>2</sub>O data.

| Step   | <sup>40</sup> Ar | ±     | <sup>39</sup> Ar | ±     | <sup>38</sup> Ar | ±     | <sup>37</sup> Ar | ±     | <sup>36</sup> Ar | ±     | <sup>37</sup> Ar/ <sup>39</sup> Ar | <sup>40</sup> Ar* % | <sup>40</sup> Ar*/ <sup>39</sup> Ar | ±     | Age    | ± <sup>40</sup> Ar/ <sup>39</sup> Ar |
|--------|------------------|-------|------------------|-------|------------------|-------|------------------|-------|------------------|-------|------------------------------------|---------------------|-------------------------------------|-------|--------|--------------------------------------|
| Step1  | -2.517           | 1.286 | -0.084           | 0.070 | -0.063           | 0.047 | -0.153           | 0.095 | -0.082           | 0.056 | 1.82                               | n.d.                | n.d.                                | n.d.  | n.d.   | 30.10                                |
| Step2  | 29.320           | 1.288 | 0.783            | 0.070 | 0.100            | 0.048 | 0.326            | 0.095 | 0.176            | 0.056 | 0.42                               | n.d.                | n.d.                                | n.d.  | n.d.   | 37.45                                |
| Step3  | 679.545          | 1.366 | 74.780           | 0.210 | 3.650            | 0.071 | 9.541            | 0.151 | 3.201            | 0.080 | 0.13                               | n.d.                | n.d.                                | n.d.  | 0.0    | 9.09                                 |
| Step4  | 167.013          | 1.292 | 29.203           | 0.074 | 0.906            | 0.048 | 3.024            | 0.101 | 0.667            | 0.056 | 0.10                               | n.d.                | n.d.                                | n.d.  | 0.0    | 5.72                                 |
| Step5  | 553.701          | 1.382 | 124.199          | 0.188 | 2.232            | 0.048 | 14.781           | 0.290 | 0.758            | 0.056 | 0.12                               | 59.6                | 2.655                               | 0.135 | 12.127 | 0.61                                 |
| Step6  | 412.979          | 1.815 | 101.589          | 0.286 | 1.598            | 0.048 | 17.867           | 0.337 | 0.397            | 0.056 | 0.18                               | 71.6                | 2.911                               | 0.165 | 13.291 | 0.75                                 |
| Step7  | 277.445          | 1.309 | 69.513           | 0.080 | 1.047            | 0.048 | 24.236           | 0.758 | 0.249            | 0.056 | 0.35                               | 73.5                | 2.934                               | 0.241 | 13.398 | 1.09                                 |
| Step8  | 291.277          | 1.640 | 74.875           | 0.235 | 1.183            | 0.048 | 48.373           | 0.758 | 0.275            | 0.056 | 0.65                               | 72.1                | 2.804                               | 0.224 | 12.804 | 1.01                                 |
| Step9  | 335.474          | 1.290 | 62.654           | 0.073 | 0.982            | 0.048 | 28.165           | 0.751 | 0.499            | 0.056 | 0.45                               | 56.0                | 2.999                               | 0.267 | 13.691 | 1.21                                 |
| Step10 | 320.286          | 1.352 | 51.357           | 0.101 | 0.895            | 0.048 | 35.279           | 0.672 | 0.568            | 0.056 | 0.69                               | 47.6                | 2.969                               | 0.326 | 13.557 | 1.47                                 |
| Total  | 3064.522         | 4.466 | 588.871          | 0.504 | 12.530           | 0.160 | 181.441          | 1.553 | 6.708            | 0.187 | 0.31                               | 35.3                |                                     |       |        |                                      |

**Wanapum Formation, Roza Member† - DF1-(1). Fresh wholerock chips (groundmass & crystals). Plateau steps: 3 to 10, inclusive.**

J-value: 0.002540

Plateau age: 16.50 ± 0.23

No wholerock K<sub>2</sub>O data.

| Step | <sup>40</sup> Ar | ± | <sup>39</sup> Ar | ± |
|------|------------------|---|------------------|---|
|------|------------------|---|------------------|---|

| Step   | <sup>40</sup> Ar | ±     | <sup>39</sup> Ar | ±     | <sup>38</sup> Ar | ±     | <sup>37</sup> Ar | ±     | <sup>36</sup> Ar | ±     | <sup>37</sup> Ar/ <sup>39</sup> Ar | <sup>40</sup> Ar* % | <sup>40</sup> Ar*/ <sup>39</sup> Ar | ±     | Age    | ± <sup>40</sup> Ar/ <sup>39</sup> Ar |
|--------|------------------|-------|------------------|-------|------------------|-------|------------------|-------|------------------|-------|------------------------------------|---------------------|-------------------------------------|-------|--------|--------------------------------------|
| Step1  | 115.836          | 1.907 | 11.565           | 0.049 | 0.277            | 0.023 | 0.332            | 0.052 | 0.342            | 0.033 | 0.03                               | 12.7                | 1.267                               | 0.866 | 5.799  | 3.90 10.02                           |
| Step2  | 32.648           | 1.923 | 6.517            | 0.047 | 0.185            | 0.023 | 0.308            | 0.052 | 0.170            | 0.034 | 0.05                               | n.d.                | n.d.                                | n.d.  | n.d.   | 5.01                                 |
| Step3  | 372.088          | 1.928 | 78.089           | 0.060 | 1.273            | 0.024 | 1.980            | 0.052 | 0.506            | 0.034 | 0.03                               | 59.8                | 2.849                               | 0.129 | 13.007 | 0.58 4.76                            |
| Step4  | 712.760          | 3.100 | 168.917          | 0.063 | 2.393            | 0.030 | 8.044            | 0.073 | 0.546            | 0.034 | 0.05                               | 77.3                | 3.264                               | 0.061 | 14.895 | 0.28 4.22                            |
| Step5  | 1013.260         | 1.964 | 230.657          | 0.170 | 3.301            | 0.023 | 18.128           | 0.099 | 0.778            | 0.034 | 0.08                               | 77.3                | 3.396                               | 0.044 | 15.495 | 0.21 4.39                            |
| Step6  | 941.236          | 2.251 | 198.649          | 0.082 | 2.949            | 0.030 | 19.860           | 0.138 | 0.998            | 0.039 | 0.10                               | 68.7                | 3.253                               | 0.059 | 14.846 | 0.27 4.74                            |
| Step7  | 1085.064         | 1.972 | 209.917          | 0.066 | 2.949            | 0.028 | 21.556           | 0.127 | 1.118            | 0.034 | 0.10                               | 69.5                | 3.595                               | 0.048 | 16.399 | 0.23 5.17                            |
| Step8  | 517.328          | 1.913 | 99.385           | 0.072 | 1.381            | 0.024 | 10.816           | 0.089 | 0.522            | 0.034 | 0.11                               | 70.2                | 3.652                               | 0.102 | 16.659 | 0.46 5.21                            |
| Step9  | 597.410          | 0.671 | 111.217          | 0.052 | 1.572            | 0.026 | 13.535           | 0.085 | 0.708            | 0.029 | 0.12                               | 65.0                | 3.490                               | 0.076 | 15.925 | 0.35 5.37                            |
| Step10 | 459.034          | 0.616 | 88.365           | 0.054 | 1.252            | 0.026 | 10.343           | 0.042 | 0.480            | 0.028 | 0.12                               | 69.1                | 3.590                               | 0.093 | 16.376 | 0.42 5.19                            |
| Step11 | 169.150          | 0.633 | 32.469           | 0.065 | 0.464            | 0.026 | 5.231            | 0.050 | 0.216            | 0.027 | 0.16                               | 62.3                | 3.244                               | 0.251 | 14.805 | 1.13 5.21                            |
| Total  | 6015.817         | 6.194 | 1235.744         | 0.259 | 17.993           | 0.086 | 110.133          | 0.279 | 6.387            | 0.108 | 0.09                               | 68.6                |                                     |       |        |                                      |

| Wanapum Formation, Roza Member - FsC7 (groundmass). No plateau. |                  |       |                  |       |                  |       |                  |        |                  |       |                                    |                     |                                     |       |        | J-value: 0.005284 Plateau age: no plateau |
|-----------------------------------------------------------------|------------------|-------|------------------|-------|------------------|-------|------------------|--------|------------------|-------|------------------------------------|---------------------|-------------------------------------|-------|--------|-------------------------------------------|
| Wholerock K <sub>2</sub> O = 1.25 wt % (Vye, PhD thesis)        |                  |       |                  |       |                  |       |                  |        |                  |       |                                    |                     |                                     |       |        |                                           |
| Step                                                            | <sup>40</sup> Ar | ±     | <sup>39</sup> Ar | ±     | <sup>38</sup> Ar | ±     | <sup>37</sup> Ar | ±      | <sup>36</sup> Ar | ±     | <sup>37</sup> Ar/ <sup>39</sup> Ar | <sup>40</sup> Ar* % | <sup>40</sup> Ar*/ <sup>39</sup> Ar | ±     | Age    | ± <sup>40</sup> Ar/ <sup>39</sup> Ar      |
| Step1                                                           | 7.705            | 0.336 | 2.680            | 0.058 | 0.001            | 0.033 | 2.459            | 0.190  | -0.001           | 0.008 | 0.92                               | 102.5               | 2.946                               | 0.947 | 27.869 | 8.81 2.87                                 |
| Step2                                                           | 387.956          | 0.957 | 208.722          | 0.124 | 2.893            | 0.036 | 263.121          | 0.984  | 0.367            | 0.011 | 1.26                               | 72.0                | 1.339                               | 0.016 | 12.716 | 0.16 1.86                                 |
| Step3                                                           | 320.980          | 0.610 | 165.932          | 0.173 | 2.657            | 0.035 | 266.080          | 0.991  | 0.363            | 0.011 | 1.60                               | 66.6                | 1.289                               | 0.020 | 12.241 | 0.19 1.93                                 |
| Step4                                                           | 717.780          | 0.731 | 350.535          | 0.603 | 5.439            | 0.038 | 916.401          | 3.141  | 0.817            | 0.011 | 2.61                               | 66.4                | 1.359                               | 0.010 | 12.905 | 0.11 2.05                                 |
| Step5                                                           | 775.729          | 0.465 | 346.613          | 0.497 | 5.131            | 0.040 | 817.908          | 23.202 | 0.912            | 0.024 | 2.36                               | 65.3                | 1.461                               | 0.021 | 13.870 | 0.20 2.24                                 |
| Step6                                                           | 519.403          | 0.468 | 257.819          | 0.195 | 4.059            | 0.035 | 939.674          | 7.332  | 0.553            | 0.011 | 3.64                               | 68.6                | 1.381                               | 0.012 | 13.116 | 0.13 2.01                                 |
| Step7                                                           | 518.772          | 0.356 | 247.014          | 0.145 | 3.934            | 0.036 | 1069.921         | 8.273  | 0.514            | 0.011 | 4.33                               | 70.7                | 1.485                               | 0.013 | 14.098 | 0.14 2.10                                 |
| Step8                                                           | 228.246          | 0.356 | 117.062          | 0.138 | 1.810            | 0.034 | 619.539          | 6.097  | 0.220            | 0.008 | 5.29                               | 71.6                | 1.395                               | 0.022 | 13.252 | 0.21 1.95                                 |
| Total                                                           | 3476.572         | 1.620 | 1696.377         | 0.859 | 25.922           | 0.102 | 4895.102         | 26.638 | 3.745            | 0.036 | 2.89                               | 68.2                |                                     |       |        |                                           |

| Wanapum Formation, Roza Member - CRB06-153 (groundmass). No plateau |                  |       |                  |       |                  |       |                  |       |                  |       |                                    |                     |                                     |       |        | J-value: 0.007162 Plateau age: no plateau |
|---------------------------------------------------------------------|------------------|-------|------------------|-------|------------------|-------|------------------|-------|------------------|-------|------------------------------------|---------------------|-------------------------------------|-------|--------|-------------------------------------------|
| No wholerock K <sub>2</sub> O data.                                 |                  |       |                  |       |                  |       |                  |       |                  |       |                                    |                     |                                     |       |        |                                           |
| Step                                                                | <sup>40</sup> Ar | ±     | <sup>39</sup> Ar | ±     | <sup>38</sup> Ar | ±     | <sup>37</sup> Ar | ±     | <sup>36</sup> Ar | ±     | <sup>37</sup> Ar/ <sup>39</sup> Ar | <sup>40</sup> Ar* % | <sup>40</sup> Ar*/ <sup>39</sup> Ar | ±     | Age    | ± <sup>40</sup> Ar/ <sup>39</sup> Ar      |
| Step1                                                               | 13.057           | 0.021 | 5.944            | 0.019 | 0.076            | 0.006 | 0.278            | 0.024 | 0.004            | 0.000 | 0.05                               | 91.6                | 2.012                               | 0.007 | 25.805 | 0.15 2.20                                 |
| Step2                                                               | 273.701          | 0.121 | 208.943          | 0.139 | 2.857            | 0.010 | 46.325           | 0.024 | 0.094            | 0.004 | 0.22                               | 89.8                | 1.177                               | 0.005 | 15.141 | 0.10 1.31                                 |
| Step3                                                               | 189.851          | 0.055 | 148.035          | 0.092 | 1.987            | 0.007 | 36.947           | 0.024 | 0.013            | 0.004 | 0.25                               | 98.0                | 1.257                               | 0.008 | 16.162 | 0.12 1.28                                 |
| Step4                                                               | 154.920          | 0.255 | 117.450          | 0.090 | 1.613            | 0.006 | 46.491           | 0.005 | 0.113            | 0.012 | 0.40                               | 78.4                | 1.035                               | 0.030 | 13.317 | 0.39 1.32                                 |
| Step5                                                               | 121.474          | 0.027 | 86.795           | 0.126 | 1.252            | 0.006 | 58.554           | 0.005 | 0.087            | 0.012 | 0.67                               | 78.8                | 1.103                               | 0.041 | 14.196 | 0.52 1.40                                 |
| Step6                                                               | 89.839           | 0.103 | 59.986           | 0.047 | 0.887            | 0.005 | 79.648           | 0.005 | 0.078            | 0.011 | 1.33                               | 74.4                | 1.115                               | 0.056 | 14.348 | 0.72 1.50                                 |
| Total                                                               | 842.842          | 0.307 | 627.153          | 0.233 | 8.670            | 0.017 | 268.242          | 0.042 | 0.389            | 0.021 | 0.43                               | 86.4                |                                     |       |        |                                           |

| Wanapum Formation, Roza Member - CRB06-153 dup (groundmass). Plateau steps: 1 to 3, inclusive. |                  |       |                  |       |                  |       |                  |       |                  |       |                                    |                     |                                     |       |        | J-value: 0.007162 Plateau age: 14.98 ± 0.06 |
|------------------------------------------------------------------------------------------------|------------------|-------|------------------|-------|------------------|-------|------------------|-------|------------------|-------|------------------------------------|---------------------|-------------------------------------|-------|--------|---------------------------------------------|
| No wholerock K <sub>2</sub> O data.                                                            |                  |       |                  |       |                  |       |                  |       |                  |       |                                    |                     |                                     |       |        |                                             |
| Step                                                                                           | <sup>40</sup> Ar | ±     | <sup>39</sup> Ar | ±     | <sup>38</sup> Ar | ±     | <sup>37</sup> Ar | ±     | <sup>36</sup> Ar | ±     | <sup>37</sup> Ar/ <sup>39</sup> Ar | <sup>40</sup> Ar* % | <sup>40</sup> Ar*/ <sup>39</sup> Ar | ±     | Age    | ± <sup>40</sup> Ar/ <sup>39</sup> Ar        |
| Step1                                                                                          | 224.568          | 0.059 | 157.823          | 0.185 | 2.100            | 0.008 | 37.948           | 0.010 | 0.140            | 0.002 | 0.24                               | 81.6                | 1.161                               | 0.004 | 14.934 | 0.08 1.42                                   |
| Step2                                                                                          | 271.258          | 0.082 | 199.727          | 0.185 | 2.687            | 0.008 | 62.639           | 0.010 | 0.126            | 0.002 | 0.31                               | 86.3                | 1.172                               | 0.003 | 15.078 | 0.08 1.36                                   |
| Step3                                                                                          | 430.015          | 0.228 | 318.772          | 0.182 | 4.295            | 0.010 | 197.979          | 0.051 | 0.210            | 0.008 | 0.62                               | 85.6                | 1.155                               | 0.007 | 14.856 | 0.11 1.35                                   |
| Step4                                                                                          | 206.215          | 0.165 | 143.930          | 0.082 | 1.961            | 0.010 | 102.330          | 0.051 | 0.174            | 0.008 | 0.71                               | 75.0                | 1.075                               | 0.017 | 13.835 | 0.23 1.43                                   |
| Step5                                                                                          | 172.809          | 0.144 | 104.292          | 0.101 | 1.479            | 0.008 | 120.561          | 0.051 | 0.207            | 0.008 | 1.16                               | 64.5                | 1.069                               | 0.024 | 13.761 | 0.31 1.66                                   |
| Step6                                                                                          | 305.603          | 0.073 | 199.244          | 0.095 | 2.800            | 0.009 | 234.157          | 0.010 | 0.267            | 0.004 | 1.18                               | 74.2                | 1.138                               | 0.006 | 14.648 | 0.10 1.53                                   |
| Total                                                                                          | 1610.467         | 0.340 | 1123.788         | 0.357 | 15.322           | 0.022 | 755.614          | 0.090 | 1.124            | 0.015 | 0.67                               | 79.4                |                                     |       |        |                                             |

| Wanapum Formation, Basalt of Sand Hollow - CL4 (groundmass). Plateau steps: 4 to 8, inclusive.                                                    |                  |       |                  |       |                  |       |                  |       |                  |       |                                    |                     |                                     |       |        | J-value: 0.002540 Plateau age: 16.42 ± 0.38 |
|---------------------------------------------------------------------------------------------------------------------------------------------------|------------------|-------|------------------|-------|------------------|-------|------------------|-------|------------------|-------|------------------------------------|---------------------|-------------------------------------|-------|--------|---------------------------------------------|
| No wholerock K <sub>2</sub> O data, but detailed sampling of Sand Hollow lavas revealed variations from 0.88 to 1.62 wt % (n=98; Vye, PhD thesis) |                  |       |                  |       |                  |       |                  |       |                  |       |                                    |                     |                                     |       |        |                                             |
| Step                                                                                                                                              | <sup>40</sup> Ar | ±     | <sup>39</sup> Ar | ±     | <sup>38</sup> Ar | ±     | <sup>37</sup> Ar | ±     | <sup>36</sup> Ar | ±     | <sup>37</sup> Ar/ <sup>39</sup> Ar | <sup>40</sup> Ar* % | <sup>40</sup> Ar*/ <sup>39</sup> Ar | ±     | Age    | ± <sup>40</sup> Ar/ <sup>39</sup> Ar        |
| step 1                                                                                                                                            | 0.865            | 1.286 | 0.027            | 0.070 | 0.032            | 0.048 | 0.087            | 0.095 | 0.043            | 0.056 | 3.27                               | n.d.                | n.d.                                | n.d.  | 0.01   | 0.01 n.d.                                   |
| step 2                                                                                                                                            | 7.968            | 1.288 | 1.368            | 0.070 | 0.233            | 0.048 | 0.554            | 0.095 | 0.252            | 0.056 | 0.41                               | n.d.                | n.d.                                | n.d.  | 0.01   | 0.01 n.d.                                   |
| step 3                                                                                                                                            | 180.480          | 2.644 | 65.333           | 1.905 | 9.490            | 3.891 | 22.967           | 6.252 | 6.006            | 2.433 | 0.35                               | n.d.                | n.d.                                | n.d.  | 0.01   | 0.01 n.d.                                   |
| step 4                                                                                                                                            | 173.575          | 1.292 | 36.868           | 0.075 | 0.769            | 0.048 | 9.773            | 0.182 | 0.355            | 0.057 | 0.27                               | 39.6                | 1.862                               | 0.457 | 8.515  | 2.06 4.71                                   |
| step 5                                                                                                                                            | 236.674          | 1.289 | 61.028           | 0.082 | 1.210            | 0.048 | 16.461           | 0.226 | 0.469            | 0.056 | 0.27                               | 41.4                | 1.607                               | 0.274 | 7.350  | 1.24 3.88                                   |
| step 6                                                                                                                                            | 252.737          | 1.287 | 59.299           | 0.071 | 0.845            | 0.048 | 20.907           | 0.329 | 0.173            | 0.057 | 0.35                               | 79.8                | 3.402                               | 0.284 | 15.523 | 1.28 4.26                                   |
| step 7                                                                                                                                            | 322.710          | 1.297 | 78.044           | 0.103 | 1.047            | 0.048 | 33.812           | 0.233 | 0.173            | 0.056 | 0.43                               | 84.2                | 3.481                               | 0.214 | 15.884 | 0.97 4.13                                   |
| step 8                                                                                                                                            | 266.596          | 1.303 | 65.888           | 0.078 | 0.841            | 0.047 | 40.906           | 0.477 | 0.150            | 0.056 | 0.62                               | 83.4                | 3.374                               | 0.253 | 15.398 | 1.14 4.05                                   |
| step 9                                                                                                                                            | 383.985          | 1.289 | 95.741           | 0.084 | 1.218            | 0.048 | 50.213           | 0.645 | 0.154            | 0.056 | 0.52                               | 88.2                | 3.536                               | 0.175 | 16.135 | 0.79 4.01                                   |
| step 10                                                                                                                                           | 343.368          | 0.644 | 84.560           | 0.057 | 1.041            | 0.025 | 62.646           | 0.570 | 0.086            | 0.035 | 0.74                               | 92.6                | 3.762                               | 0.123 | 17.158 | 0.56 4.06                                   |
| Total                                                                                                                                             | 2168.958         | 4.555 | 548.156          | 1.919 | 16.726           | 3.894 | 258.325          | 6.350 | 7.860            | 2.438 | 0.47                               | -7.1                |                                     |       |        |                                             |

| Wanapum Formation, Basalt of Sand Hollow - DCy3a (groundmass). No plateau. |                  |       |                  |       |                  |       |                  |       |                  |       |                                    |                     |                                     |        |        | J-value: 0.005284 Plateau age: no plateau |
|----------------------------------------------------------------------------|------------------|-------|------------------|-------|------------------|-------|------------------|-------|------------------|-------|------------------------------------|---------------------|-------------------------------------|--------|--------|-------------------------------------------|
| Wholerock K <sub>2</sub> O = 1.22 wt % (Vye, PhD thesis)                   |                  |       |                  |       |                  |       |                  |       |                  |       |                                    |                     |                                     |        |        |                                           |
| Step                                                                       | <sup>40</sup> Ar | ±     | <sup>39</sup> Ar | ±     | <sup>38</sup> Ar | ±     | <sup>37</sup> Ar | ±     | <sup>36</sup> Ar | ±     | <sup>37</sup> Ar/ <sup>39</sup> Ar | <sup>40</sup> Ar* % | <sup>40</sup> Ar*/ <sup>39</sup> Ar | ±      | Age    | ± <sup>40</sup> Ar/ <sup>39</sup> Ar      |
| Step1                                                                      | -0.497           | 0.887 | -0.128           | 0.429 | -0.011           | 0.031 | 0.000            | 1.320 | 0.000            | 0.008 | 0.00                               | 100.0               | 3.884                               | 24.536 | 36.651 | 227.08 3.88                               |
| Step2                                                                      | -0.108           | 0.888 | -0.148           | 0.429 | -0.015           | 0.031 | 0.000            | 1.320 | 0.000            | 0.008 | 0.00                               | 100.0               | 0.733                               | 18.160 | 6.978  | 170.81 0.73                               |
| Step3                                                                      | 16.682           | 0.900 | 6.116            | 0.429 | 0.098            | 0.031 | 2.578            | 1.321 | 0.053            | 0.008 | 0.42                               | 7.0                 | 0.190                               | 0.436  | 1.812  | 4.12 2.73                                 |
| Step4                                                                      | 549.963          | 1.030 | 253.249          | 0.566 | 3.178            | 0.033 | 150.349          | 1.789 | 0.192            | 0.008 | 0.59                               | 89.7                | 1.948                               | 0.012  | 18.471 | 0.14 2.17                                 |
| Step5                                                                      | 547.625          | 0.911 | 272.928          | 0.440 | 3.341            | 0.032 | 297.721          | 3.942 | 0.081            | 0.008 | 1.09                               | 95.6                | 1.919                               | 0.010  | 18.201 | 0.13 2.01                                 |
| Step6                                                                      | 320.379          | 0.957 | 173.916          | 0.441 | 2.230            | 0.033 | 244.697          | 2.610 | 0.034            | 0.008 | 1.41                               | 96.9                | 1.784                               | 0.016  | 16.930 | 0.17 1.84                                 |

|                 |          |       |          |       |        |       |           |       |       |       |      |      |       |       |        |      |      |
|-----------------|----------|-------|----------|-------|--------|-------|-----------|-------|-------|-------|------|------|-------|-------|--------|------|------|
| step 5 - 0.7 W  | 378.379  | 0.391 | 296.289  | 0.314 | 3.988  | 0.033 | 598.050   | 0.094 | 0.326 | 0.008 | 2.02 | 74.6 | 0.952 | 0.008 | 14.827 | 0.13 | 1.28 |
| step 6 - 0.8 W  | 359.886  | 0.285 | 294.116  | 0.401 | 3.928  | 0.027 | 724.435   | 0.094 | 0.281 | 0.008 | 2.46 | 76.9 | 0.942 | 0.009 | 14.663 | 0.13 | 1.22 |
| step 7 - 1.0 W  | 353.951  | 0.690 | 279.918  | 0.931 | 3.868  | 0.024 | 889.679   | 1.670 | 0.295 | 0.016 | 3.18 | 75.3 | 0.953 | 0.017 | 14.835 | 0.27 | 1.26 |
| step 8 - 1.5 W  | 491.415  | 0.419 | 372.766  | 0.251 | 5.347  | 0.020 | 1487.750  | 1.672 | 0.479 | 0.019 | 3.99 | 71.2 | 0.938 | 0.015 | 14.615 | 0.24 | 1.32 |
| step 9 - 2.0 W  | 378.742  | 0.402 | 291.481  | 0.280 | 4.170  | 0.020 | 1209.701  | 1.673 | 0.350 | 0.016 | 4.15 | 72.7 | 0.945 | 0.017 | 14.712 | 0.25 | 1.30 |
| step 10 - 2.5 W | 279.118  | 0.443 | 217.915  | 0.363 | 3.003  | 0.019 | 964.511   | 1.674 | 0.232 | 0.019 | 4.43 | 75.4 | 0.966 | 0.026 | 15.044 | 0.40 | 1.28 |
| step 11 - 3.0 W | 244.342  | 0.528 | 185.302  | 0.257 | 2.688  | 0.029 | 894.435   | 1.675 | 0.213 | 0.019 | 4.83 | 74.2 | 0.979 | 0.030 | 15.244 | 0.47 | 1.32 |
| step 12 - 4.0 W | 209.973  | 0.385 | 161.207  | 0.276 | 2.265  | 0.022 | 779.152   | 1.676 | 0.206 | 0.019 | 4.83 | 71.0 | 0.925 | 0.035 | 14.410 | 0.53 | 1.30 |
| step 13 - 5.0 W | 207.509  | 0.394 | 166.657  | 0.414 | 2.262  | 0.020 | 918.538   | 1.677 | 0.233 | 0.019 | 5.51 | 66.9 | 0.833 | 0.034 | 12.972 | 0.52 | 1.25 |
| step 14 - 7.0 W | 104.043  | 0.399 | 86.399   | 0.249 | 1.263  | 0.022 | 431.386   | 1.678 | 0.060 | 0.019 | 4.99 | 82.9 | 0.998 | 0.065 | 15.545 | 0.99 | 1.20 |
| Total           | 4277.389 | 1.724 | 3389.541 | 1.507 | 47.246 | 0.087 | 10195.105 | 5.463 | 3.592 | 0.058 | 3.01 | 75.2 |       |       |        |      |      |

| Wanapum Formation, Basalt of Sand Hollow - PF7 (groundmass). Plateau steps: 2 to 7, inclusive.                                                     |                  |       |                  |       |                  |       |                  |       |                  |       |                                    |                     | J-value: 0.002540                  |       | Plateau age: 15.27 ± 0.18 |       |                                    |
|----------------------------------------------------------------------------------------------------------------------------------------------------|------------------|-------|------------------|-------|------------------|-------|------------------|-------|------------------|-------|------------------------------------|---------------------|------------------------------------|-------|---------------------------|-------|------------------------------------|
| No whole rock K <sub>2</sub> O data, but detailed sampling of Sand Hollow lavas revealed variations from 0.88 to 1.62 wt % (n=98; Vye, PhD thesis) |                  |       |                  |       |                  |       |                  |       |                  |       |                                    |                     |                                    |       |                           |       |                                    |
| Step                                                                                                                                               | <sup>40</sup> Ar | ±     | <sup>39</sup> Ar | ±     | <sup>38</sup> Ar | ±     | <sup>37</sup> Ar | ±     | <sup>36</sup> Ar | ±     | <sup>37</sup> Ar/ <sup>39</sup> Ar | <sup>40</sup> Ar* % | <sup>40</sup> Ar/ <sup>39</sup> Ar | ±     | Age                       | ±     | <sup>40</sup> Ar/ <sup>39</sup> Ar |
| Step1                                                                                                                                              | 21.834           | 0.642 | 2.196            | 0.033 | 0.038            | 0.019 | 0.037            | 0.041 | 0.035            | 0.030 | 0.02                               | 53.0                | 5.266                              | 4.114 | 23.975                    | 18.43 | 9.94                               |
| Step2                                                                                                                                              | 146.014          | 0.668 | 31.931           | 0.042 | 0.483            | 0.019 | 0.816            | 0.042 | 0.149            | 0.030 | 0.03                               | 69.9                | 3.196                              | 0.283 | 14.589                    | 1.28  | 4.57                               |
| Step3                                                                                                                                              | 703.736          | 0.690 | 168.348          | 0.133 | 2.398            | 0.022 | 12.436           | 0.073 | 0.422            | 0.031 | 0.07                               | 82.3                | 3.439                              | 0.054 | 15.692                    | 0.26  | 4.18                               |
| Step4                                                                                                                                              | 458.423          | 0.743 | 109.334          | 0.053 | 1.524            | 0.019 | 16.784           | 0.191 | 0.339            | 0.031 | 0.15                               | 78.2                | 3.277                              | 0.083 | 14.957                    | 0.38  | 4.19                               |
| Step5                                                                                                                                              | 70.968           | 0.646 | 17.252           | 0.034 | 0.251            | 0.019 | 3.567            | 0.058 | 0.103            | 0.030 | 0.21                               | 57.1                | 2.347                              | 0.524 | 10.724                    | 2.36  | 4.11                               |
| Step6                                                                                                                                              | 379.128          | 1.293 | 91.266           | 0.071 | 1.207            | 0.013 | 24.075           | 0.129 | 0.276            | 0.022 | 0.26                               | 78.5                | 3.262                              | 0.072 | 14.888                    | 0.33  | 4.15                               |
| Step7                                                                                                                                              | 104.939          | 1.276 | 25.161           | 0.019 | 0.333            | 0.012 | 7.735            | 0.042 | 0.063            | 0.021 | 0.31                               | 82.3                | 3.434                              | 0.258 | 15.671                    | 1.16  | 4.17                               |
| Total                                                                                                                                              | 1885.042         | 2.367 | 445.488          | 0.173 | 6.233            | 0.048 | 65.450           | 0.258 | 1.386            | 0.075 | 0.15                               | 78.3                |                                    |       |                           |       |                                    |

| Wanapum Formation, Basalt of Ginkgo - CRB05-011 (groundmass). Plateau steps: 1 to 5, inclusive. |                  |       |                  |       |                  |       |                  |       |                  |       |                                    |                     |                                    | J-value: 0.007060 |        | Plateau age: 12.48 ± 0.14 |                                    |
|-------------------------------------------------------------------------------------------------|------------------|-------|------------------|-------|------------------|-------|------------------|-------|------------------|-------|------------------------------------|---------------------|------------------------------------|-------------------|--------|---------------------------|------------------------------------|
| Whole rock K <sub>2</sub> O = 1.13 wt % (Vye, PhD thesis)                                       |                  |       |                  |       |                  |       |                  |       |                  |       |                                    |                     |                                    |                   |        |                           |                                    |
| Step                                                                                            | <sup>40</sup> Ar | ±     | <sup>39</sup> Ar | ±     | <sup>38</sup> Ar | ±     | <sup>37</sup> Ar | ±     | <sup>36</sup> Ar | ±     | <sup>37</sup> Ar/ <sup>39</sup> Ar | <sup>40</sup> Ar* % | <sup>40</sup> Ar/ <sup>39</sup> Ar | ±                 | Age    | ±                         | <sup>40</sup> Ar/ <sup>39</sup> Ar |
| Step1                                                                                           | 29.262           | 0.059 | 13.836           | 0.036 | 0.224            | 0.000 | 5.690            | 0.083 | 0.043            | 0.015 | 0.41                               | 56.2                | 1.189                              | 0.319             | 15.088 | 3.99                      | 2.11                               |
| Step2                                                                                           | 123.885          | 0.096 | 86.967           | 0.063 | 1.222            | 0.000 | 33.664           | 0.083 | 0.123            | 0.014 | 0.39                               | 70.6                | 1.005                              | 0.049             | 12.762 | 0.62                      | 1.42                               |
| Step3                                                                                           | 187.206          | 0.194 | 143.118          | 0.078 | 1.960            | 0.004 | 76.314           | 0.083 | 0.150            | 0.015 | 0.53                               | 76.3                | 0.998                              | 0.031             | 12.672 | 0.39                      | 1.31                               |
| Step4                                                                                           | 107.636          | 0.062 | 75.780           | 0.108 | 1.090            | 0.004 | 60.797           | 0.083 | 0.105            | 0.015 | 0.80                               | 71.2                | 1.012                              | 0.058             | 12.845 | 0.73                      | 1.42                               |
| Step5                                                                                           | 204.892          | 0.205 | 144.358          | 0.156 | 2.153            | 0.012 | 176.184          | 0.083 | 0.216            | 0.005 | 1.22                               | 68.9                | 0.978                              | 0.011             | 12.417 | 0.15                      | 1.42                               |
| Step6                                                                                           | 228.867          | 0.210 | 149.293          | 0.121 | 2.165            | 0.010 | 214.287          | 0.083 | 0.308            | 0.005 | 1.44                               | 60.2                | 0.923                              | 0.011             | 11.723 | 0.14                      | 1.53                               |
| Step7                                                                                           | 238.366          | 0.205 | 156.776          | 0.156 | 2.363            | 0.010 | 213.529          | 0.083 | 0.331            | 0.005 | 1.36                               | 59.0                | 0.897                              | 0.010             | 11.383 | 0.14                      | 1.52                               |
| Total                                                                                           | 1120.113         | 0.426 | 770.126          | 0.294 | 11.175           | 0.019 | 780.465          | 0.221 | 1.276            | 0.031 | 1.01                               | 66.3                |                                    |                   |        |                           |                                    |

| Wanapum Formation, Basalt of Ginkgo - CRB05-011 (dup) (groundmass). No plateau. |                  |       |                  |       |                  |       |                  |       |                  |       |                                    |                     | J-value: 0.007061                  |       | Plateau age: no plateau |      |                                    |
|---------------------------------------------------------------------------------|------------------|-------|------------------|-------|------------------|-------|------------------|-------|------------------|-------|------------------------------------|---------------------|------------------------------------|-------|-------------------------|------|------------------------------------|
| Whole rock K <sub>2</sub> O = 1.13 wt % (Vye, PhD thesis)                       |                  |       |                  |       |                  |       |                  |       |                  |       |                                    |                     |                                    |       |                         |      |                                    |
| Step                                                                            | <sup>40</sup> Ar | ±     | <sup>39</sup> Ar | ±     | <sup>38</sup> Ar | ±     | <sup>37</sup> Ar | ±     | <sup>36</sup> Ar | ±     | <sup>37</sup> Ar/ <sup>39</sup> Ar | <sup>40</sup> Ar* % | <sup>40</sup> Ar/ <sup>39</sup> Ar | ±     | Age                     | ±    | <sup>40</sup> Ar/ <sup>39</sup> Ar |
| Step1                                                                           | -0.040           | 0.162 | -0.001           | 0.019 | -0.008           | 0.000 | -0.068           | 0.055 | -0.002           | 0.002 | 92.09                              | n.d.                | n.d.                               | n.d.  | n.d.                    | n.d. | n.d.                               |
| Step2                                                                           | 233.610          | 0.216 | 11.793           | 0.025 | 0.268            | 0.004 | 7.605            | 0.055 | 0.676            | 0.002 | 0.64                               | 14.5                | 2.863                              | 0.051 | 36.110                  | 0.65 | 19.81                              |
| Step3                                                                           | 1636.210         | 0.502 | 90.719           | 0.088 | 2.210            | 0.012 | 99.195           | 0.055 | 5.033            | 0.019 | 1.09                               | 9.1                 | 1.641                              | 0.062 | 20.778                  | 0.78 | 18.04                              |
| Step4                                                                           | 298.202          | 0.263 | 65.879           | 0.066 | 1.037            | 0.004 | 83.396           | 0.055 | 0.797            | 0.004 | 1.27                               | 21.0                | 0.952                              | 0.020 | 12.092                  | 0.25 | 4.53                               |
| Step5                                                                           | 277.626          | 0.323 | 80.724           | 0.198 | 1.146            | 0.005 | 129.500          | 0.314 | 0.667            | 0.004 | 1.60                               | 29.0                | 0.998                              | 0.016 | 12.672                  | 0.21 | 3.44                               |
| Step6                                                                           | 280.584          | 0.302 | 168.564          | 0.169 | 2.257            | 0.009 | 350.528          | 0.315 | 0.369            | 0.004 | 2.08                               | 61.2                | 1.018                              | 0.008 | 12.921                  | 0.11 | 1.66                               |
| Step7                                                                           | 760.461          | 0.407 | 180.760          | 0.092 | 2.936            | 0.012 | 656.900          | 0.315 | 2.100            | 0.015 | 3.63                               | 18.4                | 0.774                              | 0.025 | 9.828                   | 0.32 | 4.21                               |
| Step8                                                                           | 462.518          | 2.674 | 124.777          | 0.104 | 2.045            | 0.007 | 527.109          | 0.281 | 1.211            | 0.010 | 4.22                               | 22.6                | 0.838                              | 0.032 | 10.647                  | 0.41 | 3.71                               |
| Total                                                                           | 3949.170         | 2.811 | 723.214          | 0.316 | 11.891           | 0.022 | 1854.165         | 0.622 | 10.852           | 0.028 | 2.56                               | 18.8                |                                    |       |                         |      |                                    |

| Wanapum Formation, Basalt of Ginkgo - CRB05-012 (groundmass). No plateau. |                  |       |                  |       |                  |       |                  |       |                  |       |                                    |                     | J-value: 0.007038                  |       | Plateau age: no plateau |      |                                    |
|---------------------------------------------------------------------------|------------------|-------|------------------|-------|------------------|-------|------------------|-------|------------------|-------|------------------------------------|---------------------|------------------------------------|-------|-------------------------|------|------------------------------------|
| Whole rock K <sub>2</sub> O = 1.24 wt % (Vye, PhD thesis)                 |                  |       |                  |       |                  |       |                  |       |                  |       |                                    |                     |                                    |       |                         |      |                                    |
| Step                                                                      | <sup>40</sup> Ar | ±     | <sup>39</sup> Ar | ±     | <sup>38</sup> Ar | ±     | <sup>37</sup> Ar | ±     | <sup>36</sup> Ar | ±     | <sup>37</sup> Ar/ <sup>39</sup> Ar | <sup>40</sup> Ar* % | <sup>40</sup> Ar/ <sup>39</sup> Ar | ±     | Age                     | ±    | <sup>40</sup> Ar/ <sup>39</sup> Ar |
| Step1                                                                     | 18.471           | 0.037 | 11.160           | 0.025 | 0.167            | 0.008 | 8.252            | 0.054 | 0.023            | 0.006 | 0.74                               | 64.0                | 1.059                              | 0.151 | 13.395                  | 1.89 | 1.66                               |
| Step2                                                                     | 134.247          | 0.097 | 81.815           | 0.058 | 1.103            | 0.009 | 39.635           | 0.054 | 0.128            | 0.007 | 0.48                               | 71.8                | 1.178                              | 0.025 | 14.893                  | 0.32 | 1.64                               |
| Step3                                                                     | 89.577           | 0.086 | 57.533           | 0.066 | 0.761            | 0.011 | 43.132           | 0.054 | 0.047            | 0.007 | 0.75                               | 84.3                | 1.313                              | 0.035 | 16.596                  | 0.45 | 1.56                               |
| Step4                                                                     | 231.377          | 0.101 | 152.507          | 0.089 | 2.097            | 0.011 | 110.597          | 0.054 | 0.201            | 0.007 | 0.73                               | 74.4                | 1.128                              | 0.013 | 14.271                  | 0.18 | 1.52                               |
| Step5                                                                     | 238.969          | 0.195 | 165.702          | 0.134 | 2.216            | 0.010 | 135.832          | 0.018 | 0.143            | 0.004 | 0.82                               | 82.4                | 1.188                              | 0.007 | 15.019                  | 0.11 | 1.44                               |
| Step6                                                                     | 181.621          | 0.120 | 123.207          | 0.130 | 1.742            | 0.007 | 166.000          | 0.018 | 0.142            | 0.004 | 1.35                               | 76.9                | 1.133                              | 0.009 | 14.329                  | 0.13 | 1.47                               |
| Step7                                                                     | 150.252          | 0.230 | 101.190          | 0.055 | 1.412            | 0.010 | 153.185          | 0.018 | 0.157            | 0.005 | 1.51                               | 69.1                | 1.026                              | 0.016 | 12.984                  | 0.21 | 1.48                               |
| Step8                                                                     | 67.076           | 0.145 | 45.002           | 0.055 | 0.670            | 0.010 | 107.344          | 0.018 | 0.070            | 0.005 | 2.39                               | 69.0                | 1.029                              | 0.035 | 13.012                  | 0.45 | 1.49                               |
| Total                                                                     | 1111.591         | 0.393 | 738.116          | 0.239 | 10.168           | 0.027 | 763.977          | 0.113 | 0.911            | 0.016 | 1.04                               | 75.8                |                                    |       |                         |      |                                    |

| Wanapum Formation, Basalt of Ginkgo - FsC8-(1) (groundmass). Plateau steps: 2 to 7, inclusive. |                  |       |                  |       |                  |       |                  |        |                  |       |                                    |                    |                                    | J-value: 0.005284 |        | Plateau age: 16.20 ± 0.10 |                                    |
|------------------------------------------------------------------------------------------------|------------------|-------|------------------|-------|------------------|-------|------------------|--------|------------------|-------|------------------------------------|--------------------|------------------------------------|-------------------|--------|---------------------------|------------------------------------|
| Whole rock K <sub>2</sub> O = 1.18 wt % (Vye, PhD thesis)                                      |                  |       |                  |       |                  |       |                  |        |                  |       |                                    |                    |                                    |                   |        |                           |                                    |
| Step                                                                                           | <sup>40</sup> Ar | ±     | <sup>39</sup> Ar | ±     | <sup>38</sup> Ar | ±     | <sup>37</sup> Ar | ±      | <sup>36</sup> Ar | ±     | <sup>37</sup> Ar/ <sup>39</sup> Ar | <sup>40</sup> Ar % | <sup>40</sup> Ar/ <sup>39</sup> Ar | ±                 | Age    | ±                         | <sup>40</sup> Ar/ <sup>39</sup> Ar |
| Step1                                                                                          | 818.253          | 5.687 | 442.074          | 0.441 | 5.374            | 0.042 | 569.624          | 11.808 | 0.305            | 0.011 | 1.29                               | 89.0               | 1.647                              | 0.015             | 15.632 | 0.16                      | 1.85                               |
| Step2                                                                                          | 107.578          | 0.495 | 58.777           | 0.152 | 0.749            | 0.033 | 77.363           | 0.563  | 0.014            | 0.008 | 1.32                               | 96.2               | 1.761                              | 0.044             | 16.713 | 0.42                      | 1.83                               |
| Step3                                                                                          | 182.395          | 0.479 | 100.597          | 0.220 | 1.274            | 0.033 | 134.205          | 0.882  | 0.044            | 0.008 | 1.33                               | 92.8               | 1.683                              | 0.026             | 15.974 | 0.25                      | 1.81                               |
| Step4                                                                                          | 267.204          | 0.515 | 146.975          | 0.117 | 1.764            | 0.034 | 217.056          | 1.933  | 0.060            | 0.008 | 1.48                               | 93.3               | 1.697                              | 0.017             | 16.103 | 0.18                      | 1.82                               |
| Step5                                                                                          | 213.771          | 0.389 | 118.556          | 0.111 | 1.426            | 0.034 | 209.746          | 1.670  | 0.036            | 0.008 | 1.77                               | 95.1               | 1.714                              | 0.021             | 16.268 | 0.22                      | 1.80                               |
| Step6                                                                                          | 303.082          | 0.405 | 166.342          | 0.313 | 2.041            | 0.034 | 365.221          | 5.012  | 0.059            | 0.008 | 2.20                               | 94.2               | 1.717                              | 0.016             | 16.295 | 0.17                      | 1.82                               |
| Step7                                                                                          | 241.966          | 0.509 | 130.741          | 0.108 | 1.665            | 0.034 | 351.720          | 1.966  | 0.066            | 0.008 | 2.69                               | 91.9               | 1.701                              | 0.020             | 16.139 | 0.20                      | 1.85                               |
| Step8                                                                                          | 450.001          | 0.435 | 234.432          | 0.324 | 3.105            | 0.036 | 767.513          | 5.313  | 0.131            | 0.008 | 3.27                               | 91.4               | 1.754                              | 0.011             | 16.646 | 0.13                      | 1.92                               |
| Total                                                                                          | 2584.249         | 5.818 | 1398.494         | 0.712 | 17.399           | 0.099 | 2692.449         | 14.292 | 0.715            | 0.025 | 1.93                               | 91.8               |                                    |                   |        |                           |                                    |

Plateau diagrams on proceeding sheets plotted using Isoplot 3.13 (Ludwig, 2003).



# POMONA SAMPLE DCy5 (wr glassy matirx)

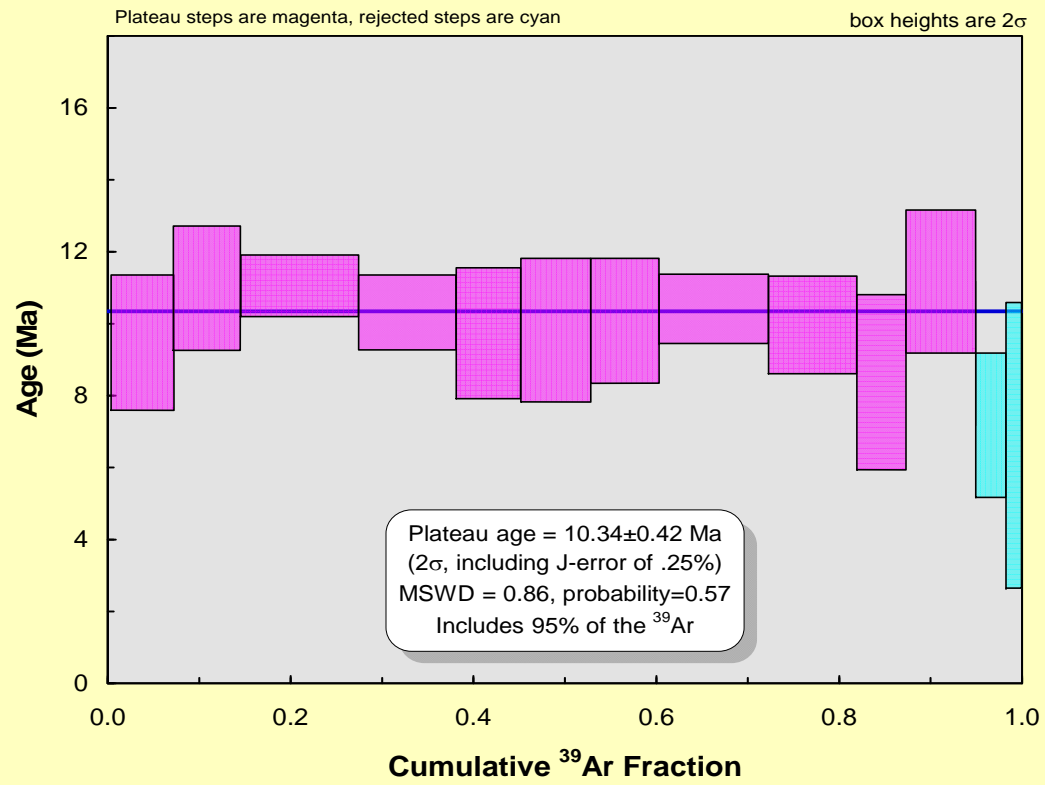

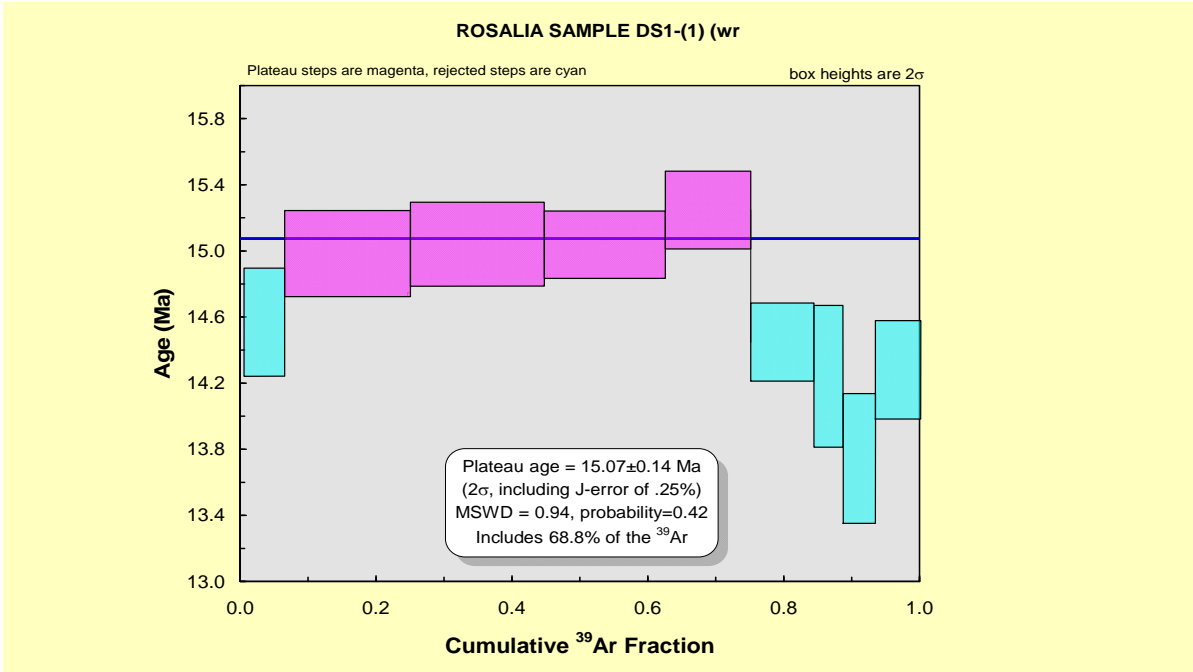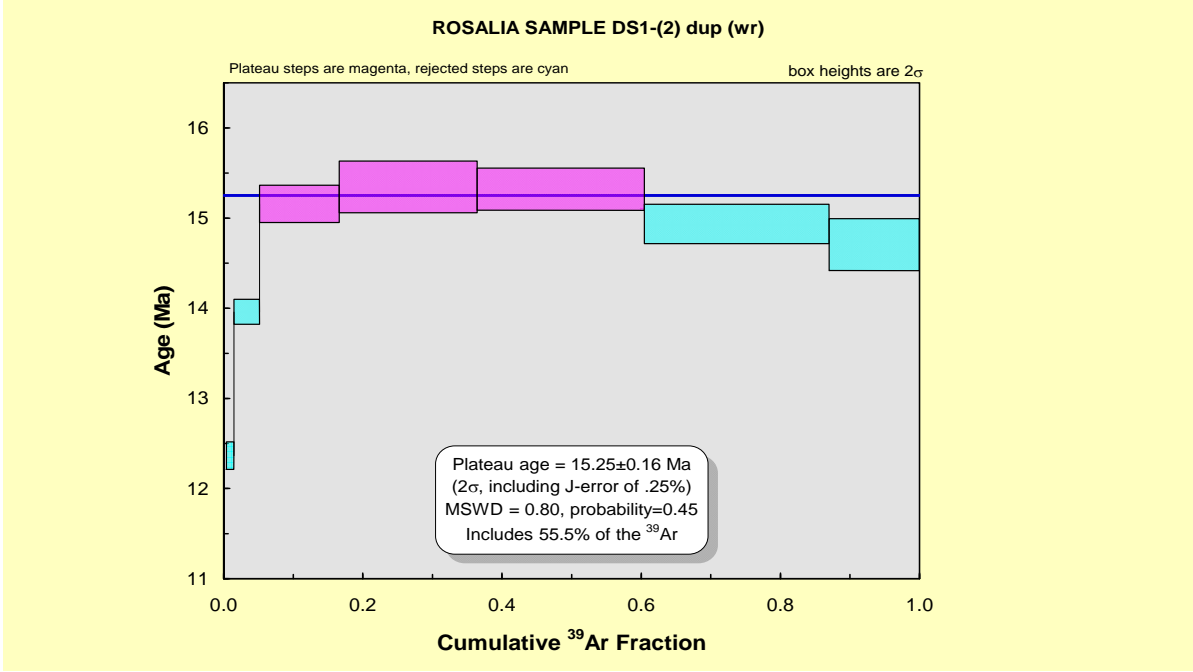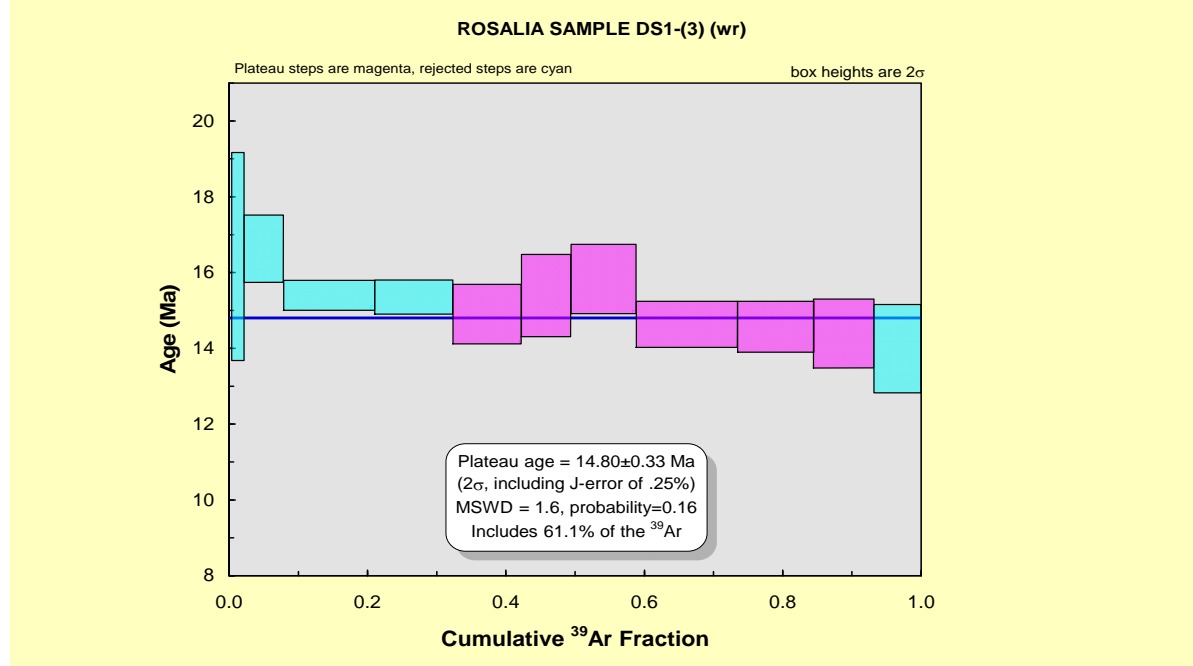

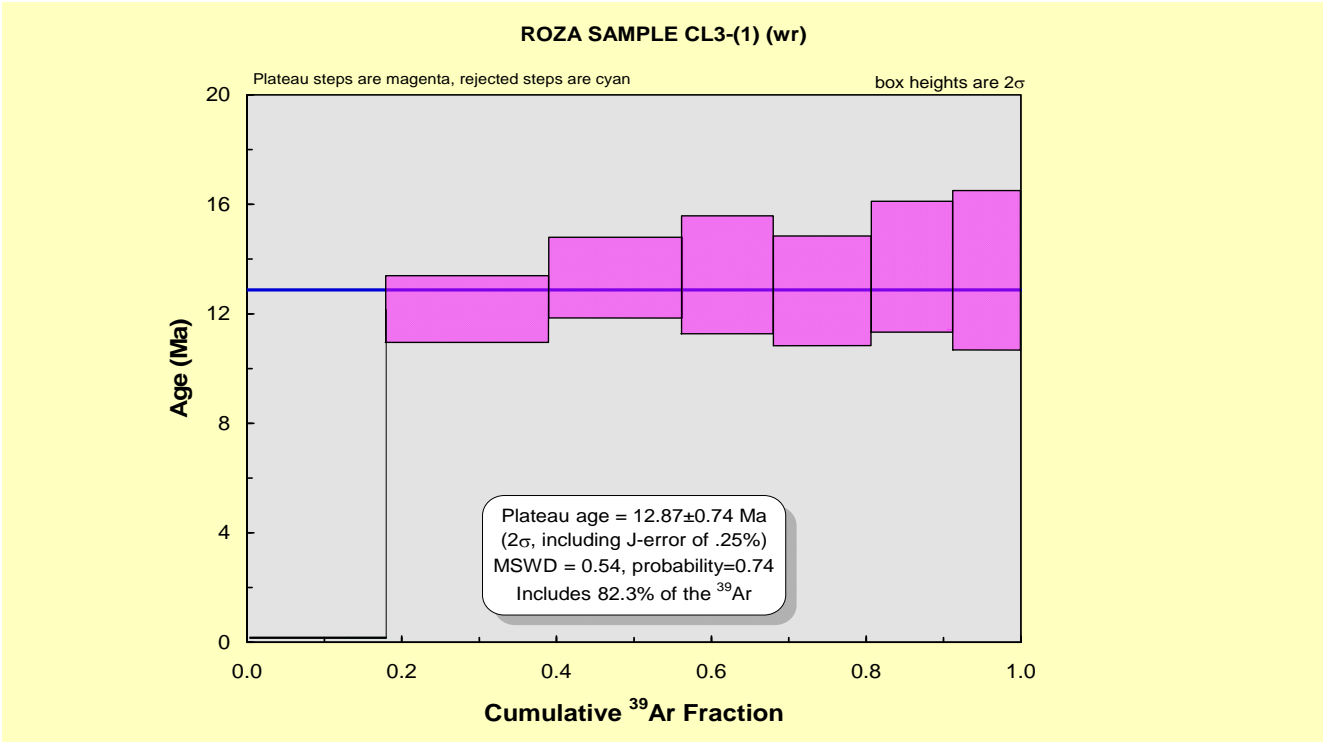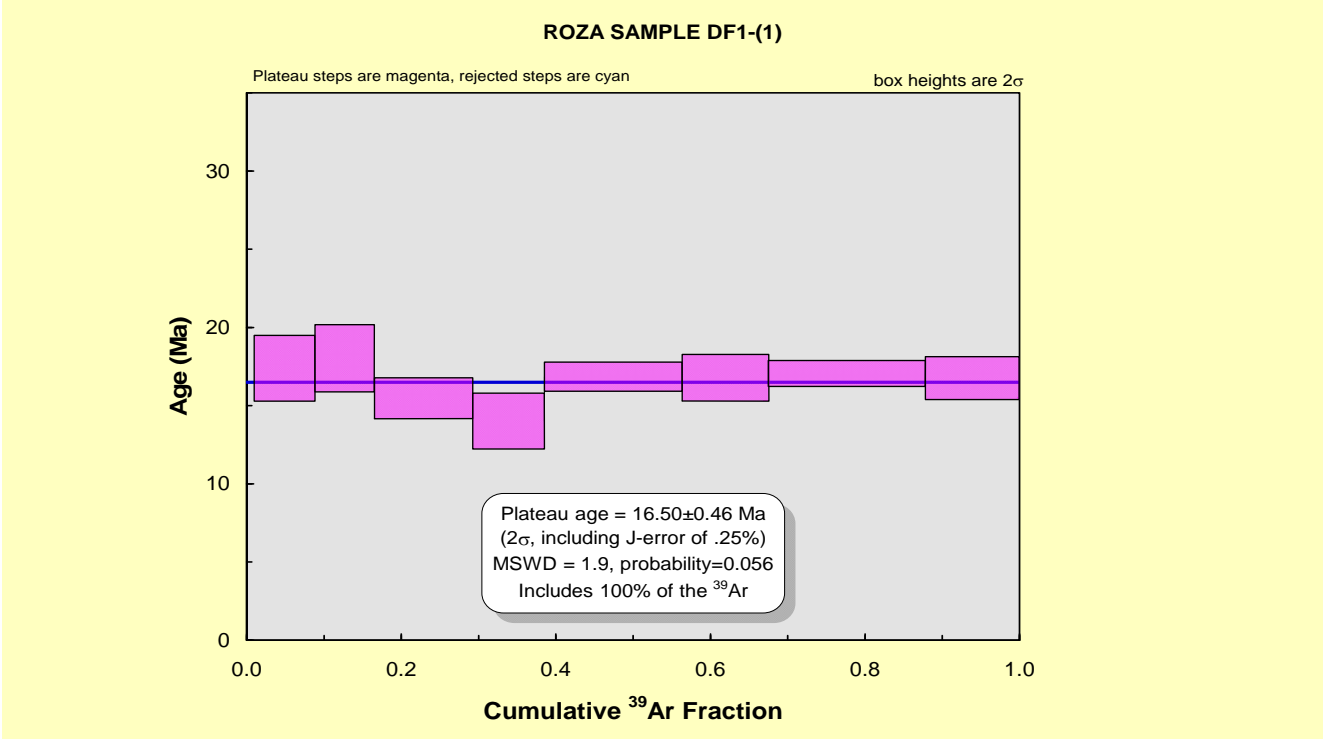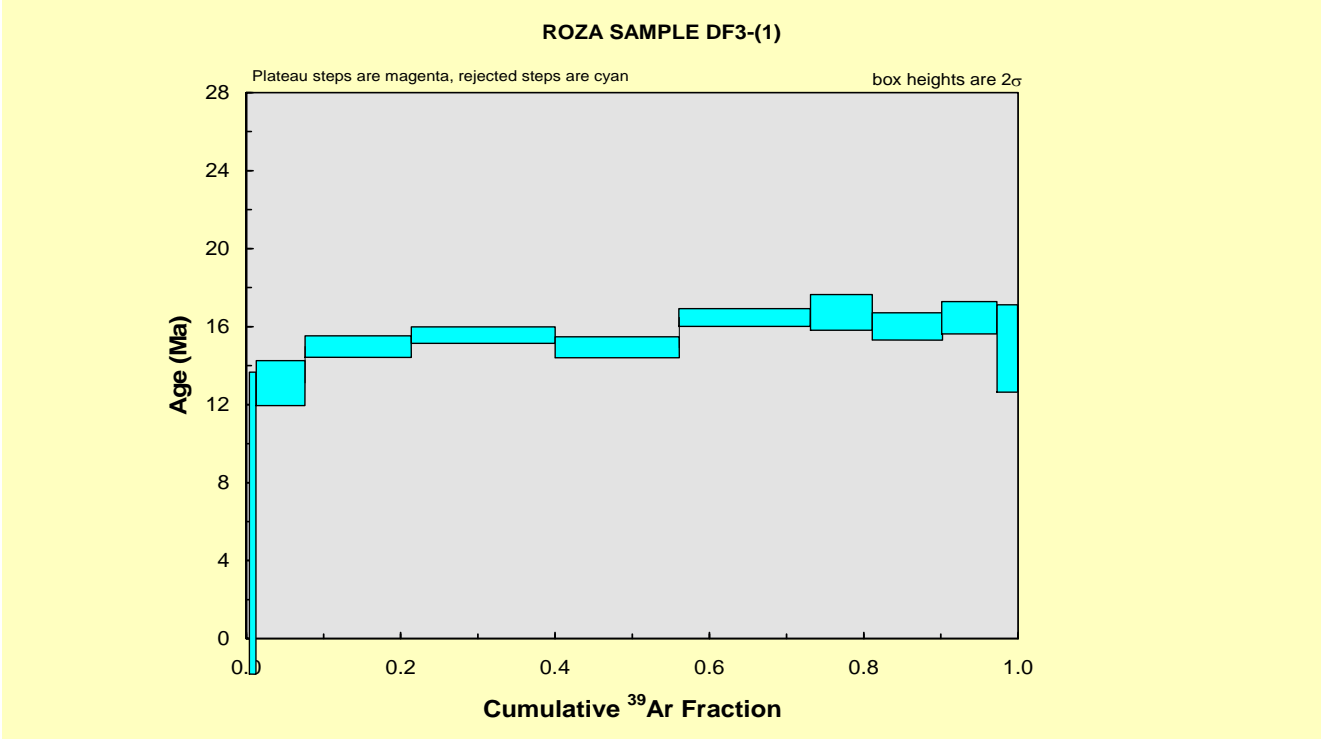

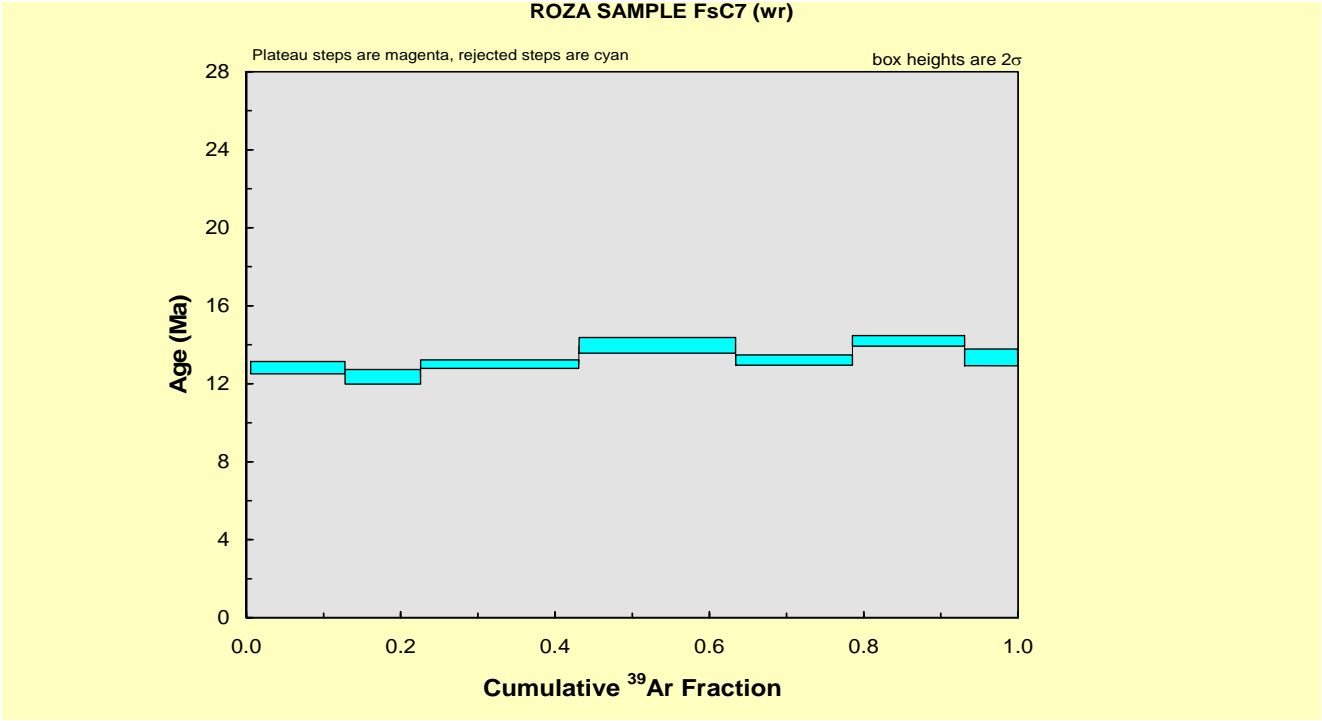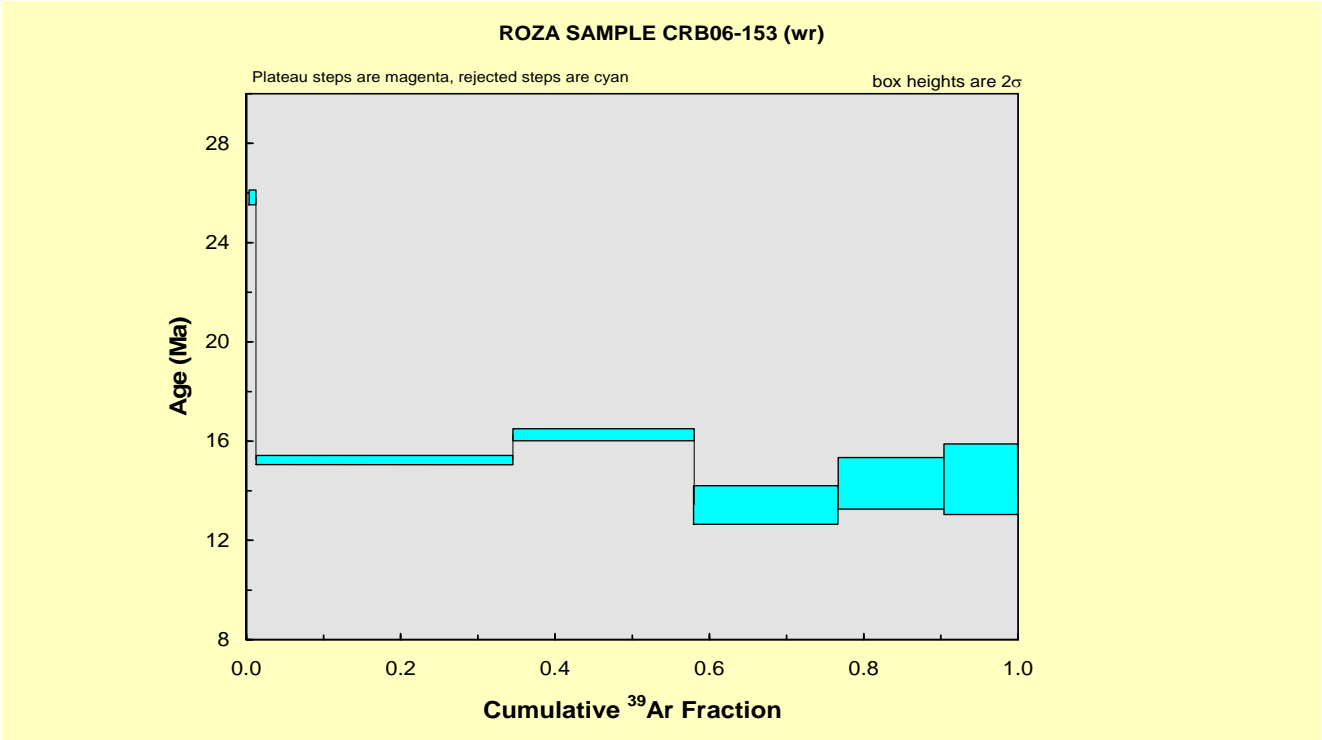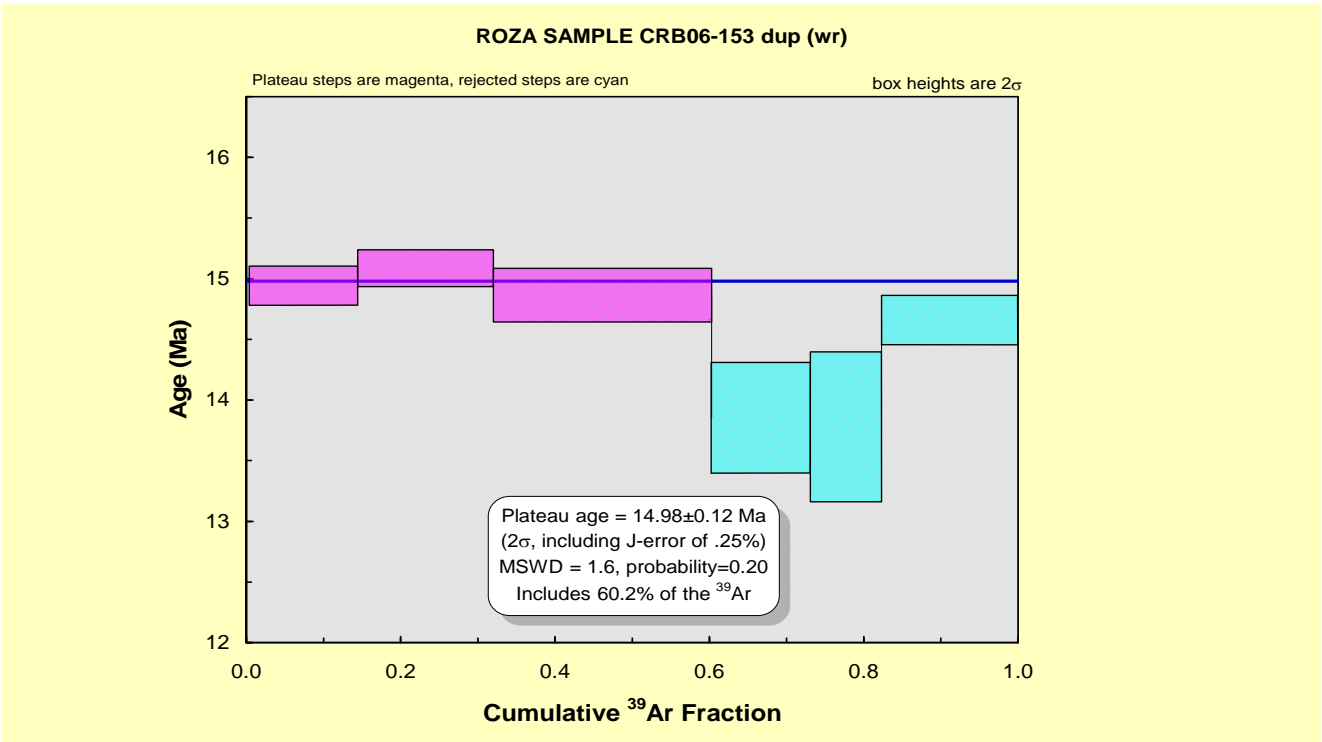

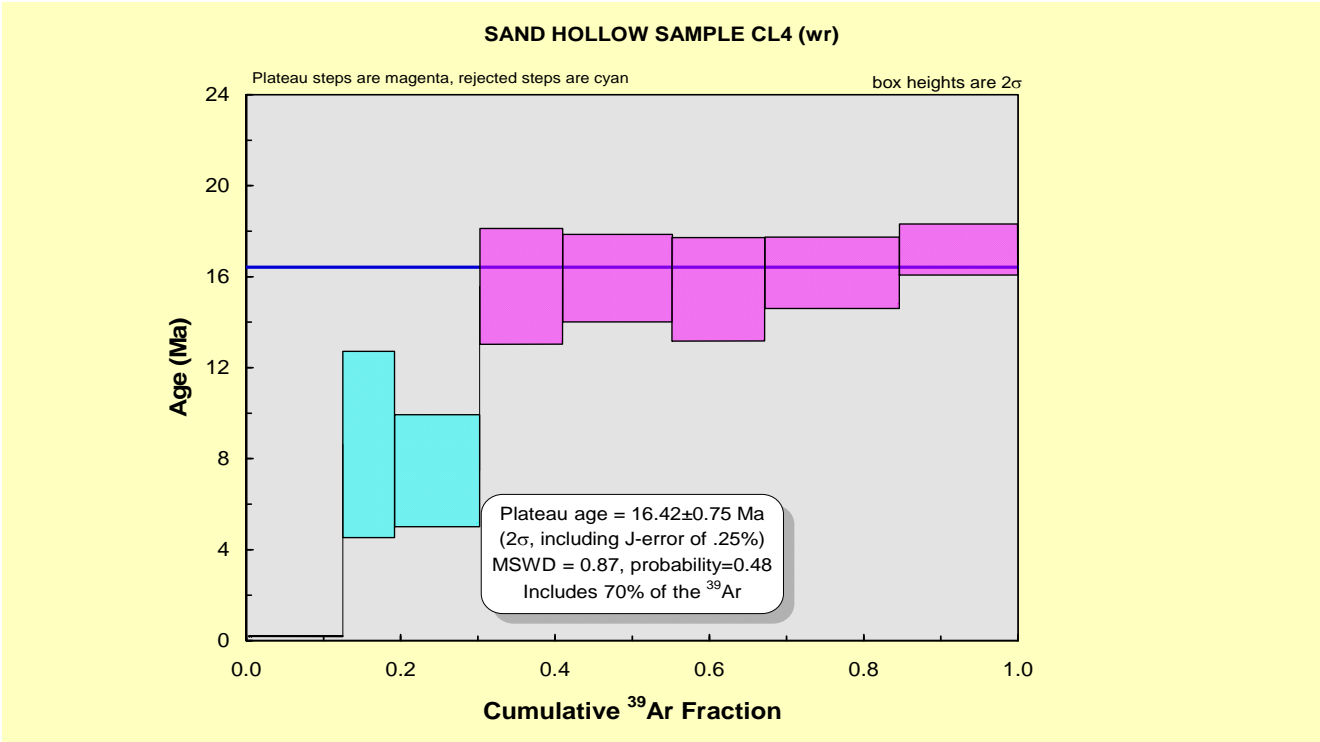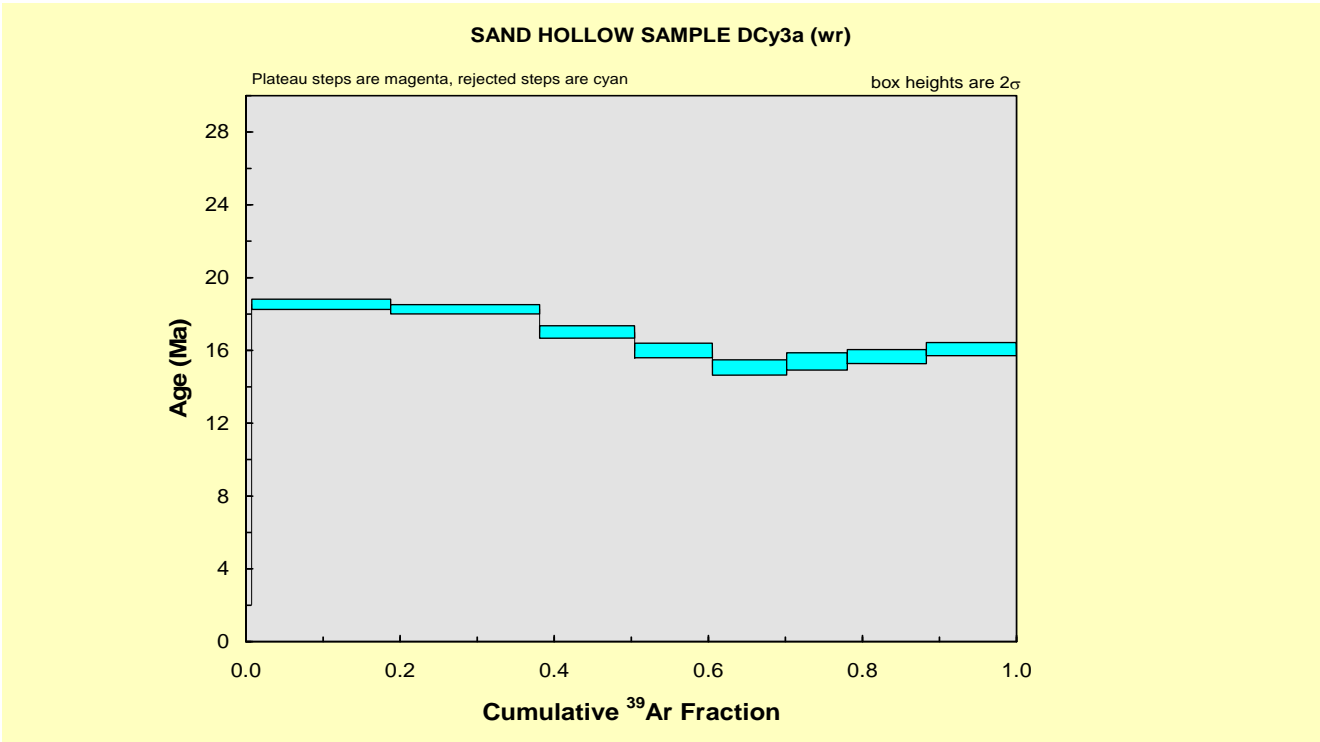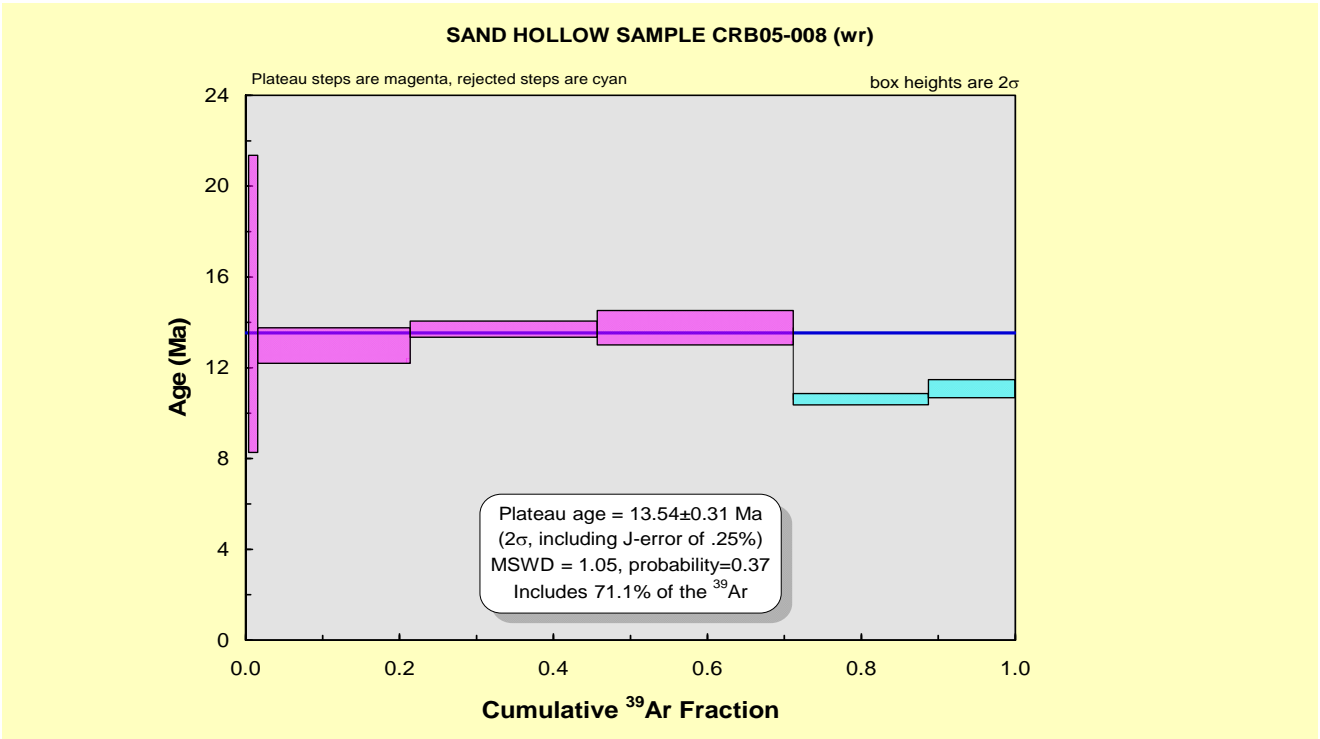

SAND HOLLOW SAMPLE CRB05-049

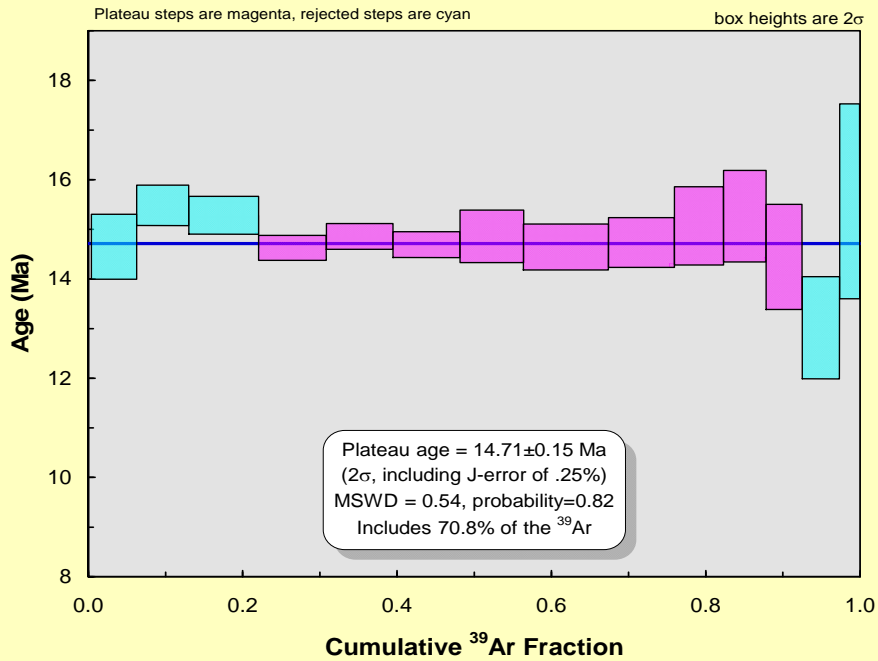

SAND HOLLOW SAMPLE PF7

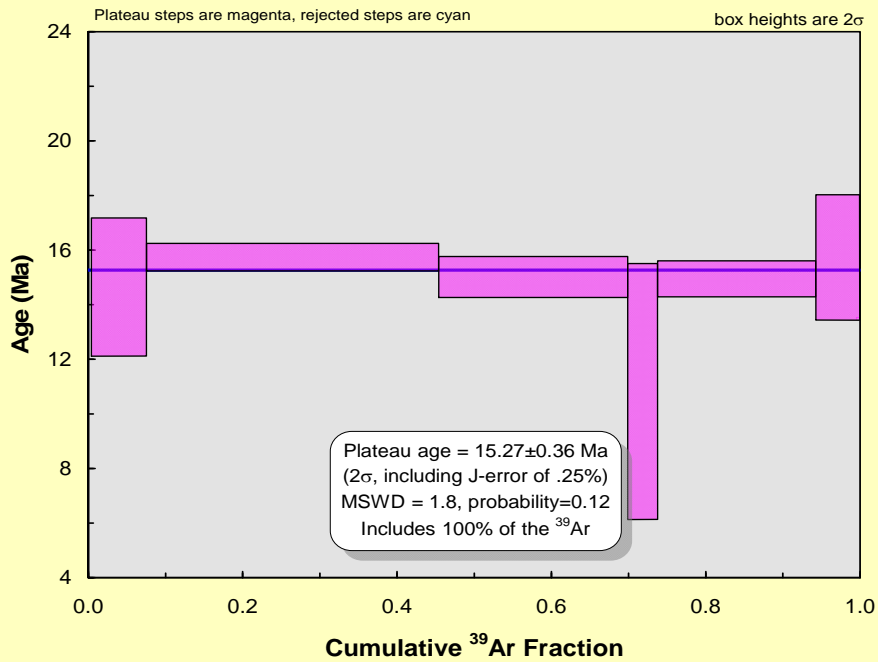

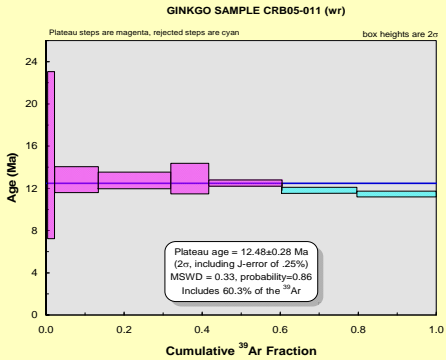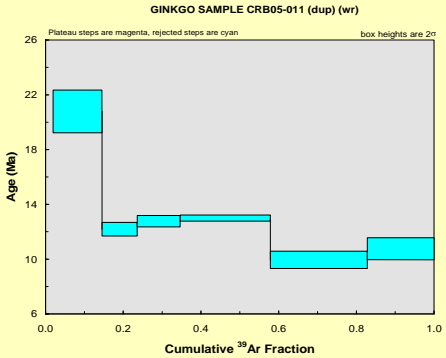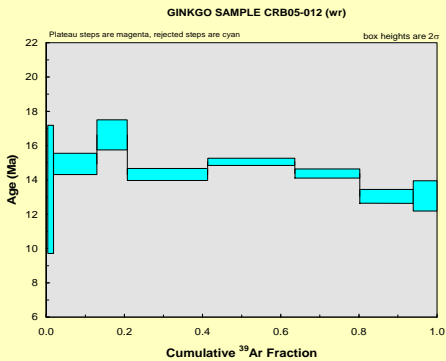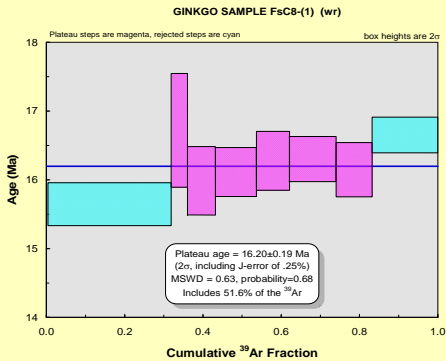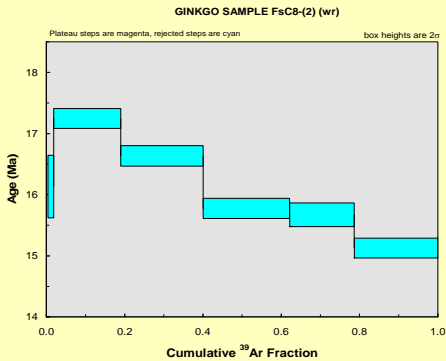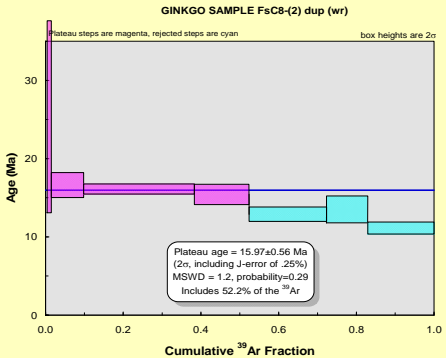

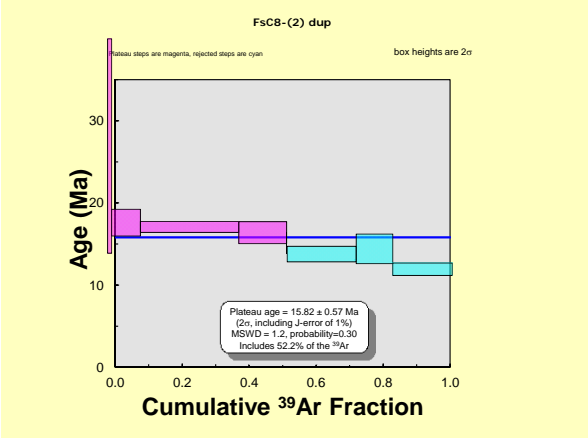

Supplement: Supplementary file 1 [file 1]
